1 **Reticulocyte Infection Leads to Altered Behaviour, Drug Sensitivity and Host Cell**  
2 **Remodelling by *Plasmodium falciparum*.**

3

4 Renugah Naidu<sup>1</sup>, Trang TT Chu<sup>1</sup>, Jaishree Tripathi<sup>2</sup>, Yang Hu<sup>1</sup>, Gowtham Subramanian<sup>1</sup>,  
5 Jie Xin Tong<sup>3</sup>, Pallavi Tripathi<sup>1</sup>, Kong Fang<sup>2</sup>, Kevin SW Tan<sup>3</sup>, Chwee Teck Lim<sup>4</sup>, Jerry  
6 K.Y. Chan<sup>5,6</sup>, Zbynek Bozdech<sup>2</sup> and Rajesh Chandramohanadas<sup>1\*</sup>

7

8 <sup>1</sup> Pillar of Engineering Product Development (EPD), Singapore University of  
9 Technology & Design (SUTD), Singapore, 487372, Singapore.

10 <sup>2</sup> School of Biological Sciences, Nanyang Technological University, Singapore

11 <sup>3</sup> Department of Microbiology and Immunology, National University of Singapore

12 <sup>4</sup> Department of Bioengineering, National University of Singapore

13 <sup>5</sup> Department of Reproductive Medicine, KK Women's and Children's Hospital,  
14 Singapore, 229899, Singapore.

15 <sup>6</sup> Duke-NUS Medical School, Singapore, 169857, Singapore.

16

17 \* Corresponding Author: Rajesh Chandramohanadas Email: [rajesh@sutd.edu.sg](mailto:rajesh@sutd.edu.sg)

18

19

20

21

22

23

24

25

26

27

28

29 **Abstract**

30 Plasmodia are host-specific, both at the organism and cellular levels. During asexual  
31 development, *Plasmodium spp.* infect cells of erythroid lineage, with an overall  
32 propensity towards reticulocytes. This applies to even *Plasmodium (P.) falciparum*, the  
33 most common causative agent of human malaria, implications of which remain  
34 unexplored. Herein, for the first time, we characterize the developmental stages and  
35 features of *P. falciparum* cultured *in vitro* in young reticulocytes (CD71<sup>+</sup>) in comparison to  
36 standard normocyte (CD71<sup>-</sup>) cultures. We demonstrate that there are notable differences  
37 in the patterns of invasion, development and sensitivity to potent antimalarials (such as  
38 artemisinin and dihydroartemisinin) for parasites residing in CD71<sup>+</sup> reticulocytes.  
39 Through a transcriptomic approach, we report that *P. falciparum* parasites are able to  
40 sense the host cell environment, and calibrate their metabolic and host cell remodelling  
41 pathways through differential gene expression. These results form an exciting avenue on  
42 which hitherto unexplored interactions between *Plasmodium spp* and different stages of  
43 host red blood cells could be investigated in the broader contexts of drug resistance,  
44 host tropism and zoonosis.

45

46 **Author Summary**

47 Parasites causing malaria infect red blood cells for development and proliferation during  
48 asexual development. This asexual erythrocytic stage determines higher parasite  
49 densities and eventual disease manifestation. Although the most virulent species of  
50 *Plasmodium* infecting humans known as *Plasmodium falciparum* is able to infect red  
51 blood cells of all ages, these parasites show a preference for younger blood cells. Of  
52 note, the biochemical and biophysical properties of young and adult red blood cells vary  
53 significantly. Herein, we undertook a comparative profiling of invasion process, parasite  
54 development and drug response of *Plasmodium falciparum* in two host cells: young red  
55 blood cells (reticulocytes) and mature red blood cells (normocytes). We demonstrate that  
56 *P. falciparum* infects human reticulocytes with higher affinity and demonstrate differential

57 sensitivity to drugs such as artemisinin while they reside within reticulocytes.  
58 Furthermore, we show that *P. falciparum* is able to detect differences in host  
59 environment and adapt to it by changing the expression of genes required for host cell  
60 remodelling.

61

## 62 **Introduction**

63 *Plasmodium* infection and associated mortality remain an important concern to the  
64 developing world with 218 million malaria cases and ~450,000 deaths annually<sup>1</sup>  
65 (<https://www.who.int/malaria/publications/world-malaria-report-2018/en/>).

66 Widespread drug-resistance<sup>2-3</sup> and evolution of newer phenotypes; influenced by factors  
67 such as changing availability and distribution of insect vector<sup>4</sup>, haematological  
68 malignancies(1, 2)<sup>5-6</sup> (thalassemia, sickle cell anaemia, G6PD deficiency etc), providing  
69 protective immunity to certain populations<sup>7</sup>, adversely impact malaria eradication  
70 campaigns. Furthermore, zoonotic infections from non-human primates, as in the case of  
71 *P. knowlesi*, is widely reported across Southeast Asia<sup>8</sup> indicating a spectrum of  
72 obscured disease manifestations challenging the developing world.

73

74 *Plasmodium spp.* demonstrate an overall propensity towards immature reticulocytes for  
75 asexual development. This is evident from invasion preference of rodent parasites such  
76 as *P. berghei*, known to infect reticulocytes with ~150-fold higher efficiency<sup>9</sup>. *P.*  
77 *falciparum*, which is responsible for the most severe form of human malaria, is able to  
78 infect red blood cells (RBCs) of all ages, yet with a preference to younger RBCs and  
79 reticulocytes<sup>10</sup>. In contrast, *P. vivax* is restricted to a sub-population of reticulocytes  
80 marked by surface transferrin receptor<sup>11</sup> (CD71) and are unable to infect mature RBCs.  
81 *P. knowlesi*, while able to infect all stages of RBCs in their natural macaque hosts,  
82 switch their invasion preferences to human reticulocytes during *in vitro* adaptation<sup>12</sup>.  
83 Since erythrocytic development is the rate limiting step in defining parasite density,

84 transmission and disease outcome, the contribution of reticulocyte infection in parasitic  
85 behaviour and adaptation remain to be investigated.

86

87 *Plasmodium spp.* have simplified metabolic capacity since they are auxotrophic for  
88 purines<sup>13</sup>, vitamins and many amino acids. However, key pathways such as glycolysis,  
89 tricarboxylic acid cycle (TCA), lipid synthesis, pentose phosphate pathway, pyrimidine  
90 biosynthesis and glycosylation are conserved in these organisms<sup>14-15</sup>. To acquire  
91 nutrients, parasites establish new permeation pathways in the host cells. Furthermore,  
92 *Plasmodium* parasites remodel the host cells to avoid immune and mechanical  
93 clearance. Many intriguing aspects of parasite-host interactions are well studied *in vitro*  
94 in the case of *P. falciparum* using mature RBCs as host cells.

95

96 Reticulocytes have vastly different biochemical composition and properties. They contain  
97 organelles which are expelled during maturation, through exocytosis, autophagy and  
98 rearrangement of cytoskeleton<sup>16-18</sup>. Reticulocytes possess mitochondria with a complete  
99 complement of enzymes, including an active TCA cycle<sup>19</sup> and are able to utilize glucose  
100 through the anaerobic Embden- Meyerhof pathway and hexose monophosphate  
101 shunt(3, 4). Furthermore, remnants of the transcriptional and translational machinery  
102 are also present in reticulocytes. On the contrary, normocytes retain metabolic  
103 processes needed for cellular survival -such as glucose oxidation and ion mobilization  
104 across electrochemical gradients to maintain native hemoglobin conformation<sup>21</sup>. In this  
105 context, the impact of two significantly different<sup>22</sup> host cell microenvironments: that of  
106 immature reticulocytes and mature normocytes, on *P. falciparum* development remains  
107 an unexplored, yet critical aspect of parasite biology.

108

109 Using reticulocytes and normocytes as *in vitro* host cells, we performed a comparative  
110 study on invasion, proliferation, drug sensitivity and host-dependent adaptations of *P.*  
111 *falciparum*. Our results highlight the significant differences in sensitivity of parasites

112 invaded into reticulocytes, for antimalarials artemisinin and dihydroartemisinin. Through  
113 a 100-cell transcriptomics study, we report key differences in the gene expression  
114 profiles associated with metabolism, antigenic variation and host cell remodeling in  
115 parasites replicated in reticulocytes. These results form an important dataset on which  
116 further investigations could be developed pertaining to the range and dynamics of  
117 parasite-host interactions with implications in progressive drug resistance and zoonosis.

118

## 119 **Results**

120

### 121 **CD71<sup>+</sup> reticulocytes support higher invasion of *P. falciparum***

122 We used umbilical cord blood (KK Women's and Children's Hospital, Singapore) for this  
123 work, since peripheral blood is not an ideal source for reticulocytes in sufficient  
124 quantities. Using a magnetic selection procedure leveraging on surface expression of  
125 CD71, we purified young reticulocytes (CD71<sup>+</sup>, magnet bound-fraction) and normocytes  
126 (CD71<sup>-</sup>, flow through fraction). Through sub-vital staining (**Fig. 1A**) and differential  
127 interference contrast (DIC) imaging (**Fig. 1B**), separation of the red cell sub-populations  
128 was confirmed, with an estimated 90% purity as reported in prior work<sup>22</sup>. Through  
129 western blotting (**Fig. 1C**) and immunofluorescence microscopy (**Fig. 1D**), robust  
130 separation of the sub-populations was validated.

131

132 We estimated the comparative invasion efficiency of *P. falciparum* into CD71<sup>+</sup> and CD71<sup>-</sup>  
133 host cells. Magnet-purified schizonts (~ 40 hpi) were introduced to both host cell types  
134 and parasitemia was determined 25 h later by counting ring-stage infections. A ~2-fold  
135 higher parasitemia (**Fig. 2A**) in CD71<sup>+</sup> cells was observed. However, the number of  
136 daughter merozoites formed were comparable irrespective of the host cell (**Fig. 2B**).  
137 Interestingly, when schizonts from CD71<sup>+</sup> cells were isolated and allowed to invade  
138 CD71<sup>-</sup> cells, invasion rates similar to the controls was observed, further indicating the  
139 normal rate of parasite multiplication in CD71<sup>+</sup> cells. Gradual CD71 loss was recorded

140 over 48 h (**Supplementary Fig. S1A**) for healthy reticulocytes. Upon infection, CD71  
141 expression was mostly unchanged up to ~18 hpi (**Supplementary Fig. S1B and S1C**) in  
142 contrast to rapid (~ 3 hpi) maturation in *P. vivax* infection<sup>11</sup>.

143

144 Next, we carried out invasion assays in presence of varying ratios of CD71<sup>+</sup> and CD71<sup>-</sup>  
145 host cells. With an initial seeding of 1% magnet-purified schizonts, 4% rings in 100%  
146 CD71<sup>-</sup> cells and 7.5% in 100% CD71<sup>+</sup> cells were recorded. As expected, higher invasion  
147 correlated with higher amount of reticulocytes (**Fig. 2D**), with maximum infection in 100%  
148 CD71<sup>+</sup> cells. These results suggest that despite a clear preference for reticulocytes, the  
149 selection is not entirely an active parasite-driven process but likely depends on the  
150 availability and proximity of CD71<sup>+</sup> host cells. Furthermore, we did not observe higher  
151 incidents of multiply infection in reticulocytes.

152

153 Engagement of host receptors is a key step during plasmodium invasion<sup>35</sup>. Prior work  
154 from our group has profiled human reticulocyte proteome which indicated marginally  
155 higher amounts of basigin on reticulocyte surface (~ 1.28-fold in comparison to mature  
156 RBCs)<sup>22</sup> (**Supplemental Fig. S2**). As anti-basigin antibodies were shown to inhibit *P.*  
157 *falciparum* invasion<sup>36</sup> we performed invasion inhibitory studies which revealed  
158 comparable invasion of both host cells at low antibody concentrations (**Fig. 2E**).  
159 However, at higher antibody concentrations (5-10 µg/ml reported from literature),  
160 invasion into CD71<sup>+</sup> cells was less affected. This could be due to a combination of  
161 marginally higher basigin expression and larger surface area for interactions on CD71<sup>+</sup>  
162 reticulocytes.

163

164 Hence, morphology and properties of CD71<sup>+</sup> and CD71<sup>-</sup> cells were determined using  
165 single cell holotomographic analysis<sup>25</sup>. These analysis confirmed distinct invaginations at  
166 various planes (indicated with white arrows) (**Fig. 3A**), differentiating both cell types.  
167 Evidently, CD71<sup>+</sup> cells were irregular in shape with higher Refractive Index (RI),

168 indicative of a denser cytoplasmic composition (**Fig. 3B**) consistent with previous data by  
169 Park and colleagues<sup>25</sup>. Furthermore, CD71<sup>+</sup> cells were significantly larger (~21%) than  
170 normocytes (**Fig. 3C**), thereby presenting larger surface area for the distribution of  
171 receptors presumably leading to easier detection and attachment by plasmodial  
172 merozoites.

173

#### 174 ***P. falciparum* grown in reticulocytes show distinct drug sensitivity profiles**

175 Reticulocytes possess complex membranous composition<sup>37</sup> and architecture rendering  
176 increased rigidity thereby influencing membrane permeability and molecular transport<sup>38</sup>.  
177 Previous studies show that reticulocytes have increased cation permeability for calcium  
178 (43-fold) and sodium (6- fold)<sup>39</sup>. Furthermore, the increased metabolic activity of CD71<sup>+</sup>  
179 reticulocytes may influence metabolism of molecules, including antimalarial drugs. In this  
180 context, we selected a broad spectrum of antimalarials (along with E64 and heparin<sup>40</sup>,  
181 inhibitors of egress and invasion respectively) and estimated their inhibitory potential  
182 against parasites cultured in CD71<sup>+</sup> and CD71<sup>-</sup> host cells.

183

184 Trophozoite stage parasites (24-26 hpi) (or schizonts at 40-42 hpi for E64 and heparin)  
185 grown in CD71<sup>+</sup> and CD71<sup>-</sup> host cells were incubated with the drugs, along with non-  
186 treated infected RBCs. New infections were counted in the next cycle (after 50-52 h post  
187 drug treatment) and/or post invasion (20 h after treatment), for heparin and E64, followed  
188 by IC<sub>50</sub> determination<sup>26</sup>. We observed comparable response and IC<sub>50</sub> values between  
189 parasites infected into CD71<sup>+</sup> and CD71<sup>-</sup> cells for most drugs (**Supplemental Table 1**)  
190 including chloroquine. Interestingly, heparin blocked parasite invasion into CD71<sup>+</sup> cells  
191 more efficiently (IC<sub>50</sub> of 1.51 µg/ml) compared to normocytes (IC<sub>50</sub> of 2.82 µg/ml), while  
192 E64 showed similar egress inhibition. In contrast, cycloheximide demonstrated  
193 remarkable killing ability against parasites in CD71<sup>+</sup> cells with an estimated IC<sub>50</sub> of 8.14  
194 while infected normocytes showed an IC<sub>50</sub> of 37.9 ng/ml. Host cell environment  
195 appeared to impact sensitivity of *P. falciparum* to ART and DHA (**Fig. 4A-B**), as CD71<sup>+</sup>

196 iRBCs coped with the drug exposure better. These changes in drug sensitivity is not  
197 influenced by the different invasion rates to host cells, as confirmed by tracking parasite  
198 response to drugs during stage transition (**Supplemental Fig. S3**). Although severe  
199 malaria in children is shown to cause reduced erythropoietic responses<sup>41</sup>, reticulocyte  
200 compensation following anemia together with sub-lethal exposure of artemisinin of  
201 parasites within CD71<sup>+</sup> reticulocytes, may render progressive drug resistance.

202

### 203 **Host-dependent gene expression profiles in *P. falciparum***

204 *Plasmodium spp.* rely on host RBCs for metabolic needs through the consumption of  
205 host hemoglobin, vitamins and other intermediates for synthetic pathways and energy  
206 metabolism<sup>42-44</sup>. In addition, a range of host cell remodeling events leading to alterations  
207 in antigen presentation<sup>45</sup>, deformability<sup>46</sup> and cytoadhesive properties<sup>47</sup> are essential for  
208 the parasite to survive within the human host. Furthermore, parasites also co-opt host  
209 cell proteins to protect from damage, stage transition and proliferation<sup>(6, 7)-49</sup>. Hence, we  
210 set out to investigate how the different host cell microenvironments impact parasite  
211 behavior. Owing to scarcity of samples, we adopted a modified 100-cell microarray  
212 technique<sup>27</sup> to study gene expression profiles.

213

214 We introduced magnet-purified parasites into CD71<sup>+</sup> and CD71<sup>-</sup> cells as described in  
215 **Scheme. 1**. Trophozoites (100 infected cells) were sorted through FACS (**Fig. 6A**) for  
216 microarray. Clearly, differential gene expression in cellular pathways associated with  
217 protein and nucleotide metabolism, virulence as well as host remodeling (**Fig. 6B**) were  
218 observed. We identified 151 genes to be differentially expressed in CD71<sup>+</sup> (cycle 1)  
219 samples such as up-regulation of translation initiation factors (PF3D7\_1312400,  
220 PF3D7\_0528200), tRNA ligases (PF3D7\_1336900, PF3D7\_0407200), pyrimidine  
221 metabolism: aspartate carbamoyltransferase (PF3D7\_1344800) and orotate  
222 phosphoribosyltransferase (PF3D7\_0512700). On the contrary, genes such as  
223 pantothenate transporter (PF3D7\_0206200) and cysteine desulfuration protein SufE<sup>50</sup>



224 (PF3D7\_0206100) involved in acetyl coenzyme A formation were significantly down-  
225 regulated in parasites infected to CD71<sup>+</sup> cells (**Fig. 6C**).

226

227 3 continuous cycles of adaptation in CD71<sup>+</sup> cells led to differential expression of 26S  
228 proteasome regulatory subunits (PF3D7\_1306400, PF3D7\_0312300), transcription  
229 regulation and mRNA splicing related genes, such as, putative DNA-directed RNA  
230 polymerase II (PF3D7\_1304900), RNA topoisomerase III (PF3D7\_1347100),  
231 transcriptional regulatory protein sir2b (PF3D7\_1451400) and small nuclear  
232 ribonucleoprotein-associated protein B, putative (PF3D7\_1414800). Additionally, genes  
233 involved in purine and pyrimidine metabolism, such as, ribonucleoside-diphosphate  
234 reductase small chain, putative (PF3D7\_1015800), adenosine deaminase  
235 (PF3D7\_1029600), aspartate carbamoyltransferase (PF3D7\_1344800) and orotate  
236 phosphoribosyltransferase (PF3D7\_0512700) were also upregulated in cycle 3 CD71<sup>+</sup>  
237 parasites.

238

239 Several genes linked to host cell interaction and remodeling were differentially regulated  
240 in parasites inside CD71<sup>+</sup> reticulocytes. A member of the *stevor* multigene family  
241 (PF3D7\_0222800), responsible for host invasion and rosetting<sup>51</sup> showed reduced  
242 expression in CD71<sup>+</sup> reticulocytes. In addition, *P. falciparum* erythrocyte membrane  
243 protein 1 (*PEMP1*) of the *var* family showed distinct patterns with PF3D7\_1255200  
244 showing reduced expression while PF3D7\_0632500 showing up-regulation in CD71<sup>+</sup>  
245 host cells. Similarly, expression of knob-associated histidine-rich protein (KAHRP)  
246 (PF3D7\_0202000), a major component of adhesive knobs<sup>52</sup> on iRBC surface was  
247 slightly down regulated in CD71<sup>+</sup> host cells, further validated through qPCR analysis  
248 (**Fig. 6C**), suggesting altered host remodeling in parasite-infected CD71<sup>+</sup> reticulocytes.

249

250 **Altered host cell remodeling in *P. falciparum* infected reticulocytes**

251 From microarray results, further validated through qPCR analyses, it appeared that  
252 expression of STEVOR, *PfEMP1* and KAHRP were differentially regulated which can  
253 contribute to antigenic, deformability, and cytoadherence properties of the infected cell.  
254 This was particularly interesting since we have shown in prior work that reticulocyte  
255 membrane is significantly rigid with different composition and assembly patterns of  
256 cytoskeletal components(5). Furthermore, our results also showed that infected CD71<sup>+</sup>  
257 cells maintain their characteristics up to ~20 hpi, with no indications of rapid maturation  
258 reported in the case of *P. vivax*. To elucidate possible correlations, we measured  
259 membrane deformability properties of *P. falciparum* infected CD71<sup>+</sup> and CD71<sup>-</sup> cells.  
260 Membrane of the healthy CD71<sup>+</sup> reticulocytes were significantly rigid with an estimated  
261 membrane shear modulus of 19 pN/ $\mu$ m compared to normocytes (average smear  
262 modulus of 6.5 pN/ $\mu$ m), as reported<sup>22-37</sup>. *P. falciparum*-infected CD71<sup>+</sup> cells remained  
263 rigid during the progression of parasites (**Fig. 7A**) in agreement with CD71<sup>+</sup> signal for up  
264 to ~20 hpi (**Supplemental S1B-C**). These findings support that *P. falciparum* is able to  
265 sense a stiffer host cell membrane (CD71<sup>+</sup>) and calibrate remodeling events by altering  
266 gene expression, particularly for members of the STEVOR and *PfEMP1* family that are  
267 involved in these processes.

268

269 Gene profiles also suggested down-regulation of KAHRP expression, which by forming  
270 cell surface knobs facilitates endothelial adhesion. In general agreement with the data,  
271 the cell surface images generated through Atomic Force Microscopy (AFM) indicated  
272 reduced distribution of knob structures (**Fig. 7B**) on the surface of infected CD71<sup>+</sup>  
273 reticulocytes. To further quantify these differences, we estimated KAHRP expression on  
274 infected CD71<sup>+</sup> and CD71<sup>-</sup> cells through imaging flow cytometry using an antibody  
275 against KAHRP, which confirmed reduced signal from CD71<sup>+</sup> cells infected with *P.*  
276 *falciparum*. We were able to measure ~20% reduction in KAHRP expression in infected  
277 CD71<sup>+</sup> cells (**Fig. 7C**).

278

279 **Discussion**

280

281 *P. falciparum* and *P. vivax* present contrasting cases in terms of distribution, disease  
282 severity<sup>53</sup>, drug sensitivity/resistance<sup>54</sup> and relapse<sup>55</sup>. Perhaps, the most intriguing  
283 aspect that differentiates these two species is the strict restriction of *P. vivax* to immature  
284 reticulocytes<sup>11</sup>. Since reticulocytes are formed in the bone marrow and only found in  
285 small numbers in the peripheral circulation, higher bone marrow parasitemia were  
286 reported for *P. vivax*, despite blood examination showing no infection<sup>56</sup>. Within the bone  
287 marrow, these parasites remain undetected and mature rapidly into transmissible forms<sup>57</sup>.  
288 Interestingly, homing of *P. falciparum* gametocytes in bone marrow has also been a topic  
289 of recent investigations<sup>58</sup>. Positive correlation between anaemia and bone marrow  
290 hemozoin/parasites in children with severe malaria reported by Aguilar *et al*<sup>59</sup> and  
291 others<sup>60</sup>, indicates that bone marrow reticulocytes remain susceptible to *P. falciparum*  
292 asexual stage development.

293

294 Reticulocyte infection is advantageous for *P. falciparum* due to the abundant resources  
295 for energy metabolism and likely protection from chemical/oxidative damage. While our  
296 results do not indicate increase in *P. falciparum* multiplication rate in reticulocytes, but  
297 they appeared to better cope with damaging effects of drugs *in vitro*. Although, apparent  
298 differences in the membrane permeability and likely metabolic fate for drugs in the  
299 reticulocyte cytoplasm cannot be ruled out as a contributing factor. While RBC damage  
300 and resultant anaemia ensues over production of reticulocytes, it offers *P. falciparum* an  
301 opportunity to invade reticulocytes. Reticulocytes contain higher amounts of hemoglobin  
302 <sup>25,61</sup>, which the parasites catabolize generating hemozoin. Artemisinin and combinations  
303 thereof target hemozoin pathway and thus required in higher doses against *P. falciparum*  
304 residing within reticulocytes. In the light of our results, contribution of host reticulocytes in  
305 progressive drug resistance warrants systematic dissection.

306

307 Energy metabolism in *Plasmodium* depends on resources available through host RBCs  
308 and beyond. For example, pantothenic acid, an essential precursor for Coenzyme A is  
309 scavenged from host RBCs or culture media<sup>62</sup>, uptake of which is facilitated by  
310 pantothenate transporter (PF3D7\_0206200). We observed reduction in the expression of  
311 this gene in *P. falciparum* infected reticulocytes. Furthermore, gene coding cysteine  
312 desulfuration SufE (PF3D7\_0206100), which is also linked to Coenzyme A biosynthesis  
313 was down-regulated in these parasites. This is interesting since the parasites invaded  
314 into reticulocytes have an overall nutrient/energy rich environment and may not be  
315 required to import and utilize extracellular pantothenate. While pantothenate transporter  
316 is refractory to deletion in *P. falciparum*, its role is primarily assigned to sexual  
317 differentiation<sup>63</sup> and transmission. Down-regulation of pantothenate transporter and  
318 associated proteins (for example phosphopantetheine adenylyltransferase) may indicate  
319 lesser commitment for sexual stage transition having sensed a rich environment for  
320 asexual proliferation. However, this hypothesis remains to be further developed.

321

322 Cytoskeletal rearrangements leading to actin remodelling through exported proteins such  
323 as PfEMP1, RESA<sup>64</sup> and STEVOR<sup>65</sup> is a hallmark of *P. falciparum* asexual development.  
324 KAHRP plays a critical role in iRBC rigidification through the formation of knobs<sup>66</sup>,  
325 accounting for 50% of the increased shear modulus. These changes are essential for  
326 parasites that are in the peripheral circulation to avoid both immune and mechanical  
327 clearance. Although *in vitro* culture conditions are known to affect transcriptional  
328 profiles<sup>67</sup>, our observations that several members of these gene families are differentially  
329 regulated implies that the parasites are able to detect a vastly different host cell  
330 properties, and adapt to it by changing gene expression. Afterall, if the primary location  
331 of infection remains the bone marrow where reticulocytes are abundant, parasites are  
332 not threatened by splenic clearance. Furthermore, *P. vivax* restricted to reticulocytes do  
333 not form knobs<sup>68</sup> and completely lack homologs of *var* genes, offers additional premises

334 to undertake these observations for future research. Evolution of new biological tools  
335 such as the ability to engineer and cultivate homogeneous populations of young red  
336 blood cells for functional dissection of host factors<sup>69-70</sup> critical for parasite invasion,  
337 development and adaptations may contribute to such efforts.

338

## 339 **Materials and Methods**

340

### 341 **Ethics Statement**

342 All plasmodium experiments were conducted with approved protocols from the  
343 Institutional Biosafety Committee (IBC) of the Singapore University of Technology and  
344 Design (SUTD). Blood for routine parasite culturing and maintenance was purchased  
345 from Interstate blood bank, USA. Cord blood samples from adult normal term  
346 pregnancies were collected at KK Women's and Children's hospital with written informed  
347 consent. Protocol to collect and use cord blood for experiments was approved by the  
348 SingHealth centralised institutional Review Board (CIRB). All cord blood samples were  
349 anonymized.

350

### 351 **Parasite culturing, synchronization and analysis**

352 Blood was centrifuged at 600 × g for 10 min to remove buffy coat and stored in Malaria  
353 Culture Medium (MCM). Washed cord blood was incubated with CD71 magnetic  
354 microbeads for isolation of reticulocytes (CD71<sup>+</sup>) through MACS (Miltenyi Biotec,  
355 Singapore), as mentioned previously(5). Unbound fraction was stored at 4°C as a source  
356 of normocytes (CD71<sup>-</sup>).

357

358 3D7 strain of *P. falciparum* was used for all experiments. Parasites were maintained in  
359 2.5% hematocrit in RPMI-HEPES medium at pH 7.4 supplemented with hypoxanthine 50  
360 µg mL<sup>-1</sup>, NaHCO<sub>3</sub> 25 mM, gentamicin 2.5 µg mL<sup>-1</sup>, and Albumax II (Gibco) 0.5% wt/vol.

361 Schizonts (~ 45 hpi) were enriched using MACS (Miltenyi Biotech, Germany) followed by  
362 selection of rings by 5% sorbitol<sup>23</sup>.

363

364 Blood smears prepared on glass slides were fixed with 100% methanol (Merck) and  
365 stained with fresh 1:10 Giemsa (Merck) solution. Smears from infected CD71<sup>+</sup> samples  
366 were stained with new methylene blue and examined under 100X oil immersion objective  
367 (Leica ICC50 W). Images of parasitic phenotypes were captured using a Leica digital  
368 camera<sup>24</sup>.

369

### 370 **Optical diffraction measurements using Tomocube™**

371 Freshly collected RBC/reticulocyte samples were diluted 1:1000 with PBS/BSA (1%) for  
372 2D Optical Diffraction Tomography (ODT) measurements. Images were acquired at  
373 multiple illumination angles using a 3D RI tomogram at an excitation at 532 nm (HT-2H,  
374 Tomocube, Inc., Daejeon, Korea), as described previously<sup>25</sup> and processed using Image  
375 J.

376

### 377 **Antimalarial drug assays**

378 Drugs were aliquoted at 10 mg/ml either in H<sub>2</sub>O (chloroquine, cycloheximide, E64 and  
379 heparin), ethanol (halofantrine) or DMSO (Dihydroartemisinin, artemisinin, atovaquone,  
380 piperazine and trichostatin A. Schizonts (~44 hpi) were introduced to CD71<sup>+</sup> and CD71<sup>-</sup>  
381 host cells separately, as seed cultures. Parasites were checked when they became  
382 trophozoites/schizonts (after ~ 35 h) through microscopy. Schizont stage parasites (40-  
383 42hpi) from the CD71<sup>+</sup> and CD71<sup>-</sup> cells were isolated and mixed with appropriate fresh  
384 host cells at 1% parasitemia and 2.5% haematocrit together with drugs. Untreated  
385 infected RBCs were included as negative controls. After 40 h, parasitemia was estimated  
386 through manual counting. Three trained researchers counted the slides independently,  
387 data represents experiments performed in triplicates. IC<sub>50</sub> values were determined using  
388 GraphPad Prism according to the recommended protocol for nonlinear regression of a

389 log(inhibitor)-versus-response curve<sup>26</sup>. An unpaired t-test was applied to ensure  
390 statistical significance.

391

### 392 **Parasite adaptation and transcriptomics**

393 Parasites grown in CD71<sup>-</sup> and CD71<sup>+</sup> cells (1 cycle and 3 cycles), each time purifying  
394 late stage parasites (~35 hpi) on MACS and re-introducing into fresh host cells. In the  
395 next cycle, cells were harvested (30 hpi), stained with Hoechst for 30 min followed by  
396 washing in PBS before sorting 100 infected cells using a BD FACSAria™ (BD  
397 Biosciences, Singapore) into 0.2 ml tubes containing cell lysis buffer (RNase inhibitor  
398 and BSA). Samples were stored in -80°C. For cDNA amplification, cell lysates were  
399 subjected to SMART-seq2 protocol<sup>27</sup> and cDNA was purified using QIAGEN PCR  
400 purification kit. Before microarray hybridization, 2 to 3 µg of cDNA was labelled with Cy5  
401 (sample) and Cy3 (reference pool) dyes and incubated for 2 h. Labelled samples were  
402 purified using QIAGEN PCR purification kit and hybridized on *P. falciparum* intragenic  
403 DNA chip at 70°C for 18 h. Next day, hybridized chips were washed and scanned on  
404 Power Scanner (Tecan).

405

### 406 **Quantitative real-time PCR (qPCR)**

407 qPCR was performed on two biological replicates, one set from RNA prepared for 100-  
408 cell microarray and a second fresh set of experiments. For the latter, total RNA was  
409 extracted (PureLink RNA mini kit, Life Technologies) and cleaned up through on-column  
410 digestion with PureLink DNase (Life Technologies) and reverse transcribed using the  
411 iScript™ cDNA Synthesis kit (Bio-Rad Laboratories). Real-time PCR was performed on a  
412 CFX-96 Touch System (Bio-Rad Laboratories). The PCR reactions were set up using  
413 iTaq™ Universal SYBR Green Supermix (Bio-Rad Laboratories), programmed at 30s/  
414 95°C followed by (10s at 95°C, 30s at 53°C) × 40. Melting curve analysis and gel  
415 electrophoresis were performed to confirm the specificity of PCR amplicons.

416

417 Gene specific primers were designed from Primer-BLAST<sup>28</sup>, sequences are given as  
418 **Supplemental Table- 2.** *P. falciparum Arginyl-tRNA synthetase* (PF3D7\_1218600) was  
419 used as reference gene<sup>29</sup>. We used Pfaffl method<sup>30</sup> to calculate normalised relative  
420 quantity (NRQ), infected normocyte (iNorm) was considered control and infected  
421 reticulocyte was considered treatment sample. The results were from two biological  
422 replicates, each with two technical replicates.

423

424 Amplification efficiency (E) of each primer pair was calculated from  $E = 10^{(-1/\text{slope})}$ . The E  
425 of all primer pairs in this study were within 1.8 - 2.0.

426  $\Delta Ct_{\text{gene of interest}} = Ct_{\text{goi control}} - Ct_{\text{goi treatment}}$ ;  $\Delta Ct_{\text{reference}} = Ct_{\text{ref control}} - Ct_{\text{ref treatment}}$ .

427

428 The normalised relative quantity was calculated as below:

429  $NRQ = (E_{\text{goi}})^{\Delta Ct_{\text{goi}}} / (E_{\text{ref}})^{\Delta Ct_{\text{Ref}}}$  where  $E_{\text{goi}}$  and  $E_{\text{ref}}$  are respectively the amplification  
430 efficiency of target gene and reference gene *Arginyl-tRNA synthetase*.

431

#### 432 **Measurement of KAHRP expression on infected reticulocytes by ImageStream**

433 Infected cells (42 hpi) were collected, washed with 1xPBS and fixed with 4%  
434 paraformaldehyde and 0.0075 % glutaraldehyde for 30 min at RT. Subsequently, cells  
435 were permeabilized in 0.1 % Triton X-100 for 5 min/RT. Following a quenching step in  
436 0.1M Glycine for 30 min/RT, blocking was done overnight at 4° C in 3% BSA/PBS.  
437 Incubation with anti- KAHRP monoclonal antibody (mAb 18.2, European Malaria  
438 Reagent Repository) at 5 µg/ml in 3 % BSA was done for 1 h at RT. Samples were  
439 washed and incubated with 1:500 goat anti-mouse IgG FITC antibody (Abcam, ab6785)  
440 together with 1 µg/ml Hoechst 33342 (Sigma Aldrich) in 3% BSA for 1 h at RT. After  
441 washing, cells were re-suspended in 70 µL PBS and used for imaging.

442

443 Data was acquired with ImageStream X MkII flow cytometer (Merck, Darmstadt,  
444 Germany) at 60x magnification for high-content single-cell analysis<sup>31</sup>. Hoechst-positive



445 (Ch 01) events were gated according to fluorescence intensity and visual inspection of  
446 images confirming only parasite-infected samples were being analyzed. From this,  
447 median fluorescence intensity (MFI) of FITC/KAHRP (Ch 02) was obtained. Background  
448 FITC fluorescence was deducted from doubly- stained healthy RBCs or reticulocytes  
449 used as blank controls. Single stain controls were prepared for compensation matrix  
450 generation by IDEAS software and applied for all 3 independent experiments.

451

#### 452 **AFM imaging of infected RBC surface**

453 AFM imaging was performed with Bruker Dimension FastScan microscope (Bruker)  
454 using super sharp silicon probes (SSS-NCHR probes, Nanosensor, Switzerland) in air  
455 tapping mode<sup>32</sup>. Height images were captured at a resolution of 512 samples per line for  
456  $1 \mu\text{m} \times 1 \mu\text{m}$  areas with a scan rate of 0.5 – 1 Hz. NanoScope Analysis software  
457 (version 1.90) was used to generate images with sample height profiles. Images were  
458 smoothed using a low-pass filter based on Gaussian convolution kernel, resulting into  
459 topographical height images of sample surface.

460

#### 461 **Micropipette aspiration**

462 A micropipette with an inner diameter of  $1 \pm 0.25 \mu\text{m}$  was used to aspirate the RBC  
463 membrane to estimate membrane stiffness, as described in prior work<sup>33</sup>. A pressure drop  
464 rate of 6 Pa/s and a total pressure drop of 100 Pa were applied to aspirate and deform  
465 each cell membrane. The aspiration was visualized on a Nikon TE2000-S microscope  
466 and processed by a Labview based software. The recorded aspiration values were  
467 manually extracted, and the shear modulus was calculated using the Hochmuth model<sup>34</sup>.

468

#### 469 **Acknowledgements**

470 RN acknowledges SUTD Ph.D. Scholarship awarded by Ministry of Education (MoE),  
471 Singapore. RN, HY, TTTC, PT, GS and RC acknowledges infrastructure support through  
472 SUTD-MIT International Design Centre (IDC) and funding through T1MOE1702 and

473 RGUOO180301 grants. Miss Faith Liew's (KK Women's and Children's hospital)  
474 assistance with blood collection and Mr Benedict Lim's (Tomocube) support with 3D RI  
475 measurements are acknowledged. JCKY received salary support from Singapore's  
476 Ministry of Health's National Medical Research Council (NMRC/CSA-SI-008-2016).

477

#### 478 **Disclosure of Conflicts of Interest**

479 The authors have declared that no competing interests exist.

480

#### 481 **References**

482

- 483 1. World malaria Report (2018) [https://www.who.int/malaria/publications/world-](https://www.who.int/malaria/publications/world-malaria-report-2018/en/)  
484 [malaria-](https://www.who.int/malaria/publications/world-malaria-report-2018/en/) report-2018/en/
- 485 2. Conrad MD, Rosenthal PJ. Antimalarial drug resistance in Africa: the calm before  
486 the storm? *Lancet Infect Dis.* 2019;19(10):e338-e351.
- 487 3. Dondorp AM, Yeung S, White L, et al. Artemisinin resistance: current status and  
488 scenarios for containment. *Nat Rev Microbiol.* 2010;8(4):272-280.
- 489 4. Bamou R, Mbakop LR, Kopya E, et al. Changes in malaria vector bionomics and  
490 transmission patterns in the equatorial forest region of Cameroon between 2000  
491 and 2017. *Parasit Vectors.* 2018;11(1):464.
- 492 5. Glushakova S, Balaban A, McQueen PG, et al. Hemoglobinopathic erythrocytes  
493 affect the intraerythrocytic multiplication of *Plasmodium falciparum* in vitro. *J*  
494 *Infect Dis.* 2014;210(7):1100-1109.
- 495 6. Guindo A, Fairhurst RM, Doumbo OK, Wellem TE, Diallo DA. X-linked G6PD  
496 deficiency protects hemizygous males but not heterozygous females against  
497 severe malaria. *PLoS Med.* 2007;4(3):e66.
- 498 7. Holz LE, Fernandez-Ruiz D, Heath WR. Protective immunity to liver-stage  
499 malaria. *Clin Transl Immunology.* 2016;5(10):e105.

- 500 8. Singh B, Daneshvar C. Human infections and detection of *Plasmodium knowlesi*.  
501 *Clin Microbiol Rev.* 2013;26(2):165-184.
- 502 9. Cromer D, Evans KJ, Schofield L, Davenport MP. Preferential invasion of  
503 reticulocytes during late-stage *Plasmodium berghei* infection accounts for  
504 reduced circulating reticulocyte levels. *Int J Parasitol.* 2006;36(13):1389-1397.
- 505 10. Pasvol G, Weatherall DJ, Wilson RJ. The increased susceptibility of young red  
506 cells to invasion by the malarial parasite *Plasmodium falciparum*. *Br J Haematol.*  
507 1980;45(2):285-295.
- 508 11. Malleret B, Li A, Zhang R, et al. *Plasmodium vivax*: restricted tropism and rapid  
509 remodeling of CD71-positive reticulocytes. *Blood.* 2015;125(8):1314-1324.
- 510 12. Lim C, Hansen E, DeSimone TM, et al. Expansion of host cellular niche can drive  
511 adaptation of a zoonotic malaria parasite to humans. *Nat Commun.* 2013;4:1638.
- 512 13. Booden T, Hull RW. Nucleic acid precursor synthesis by *Plasmodium lophurae*  
513 parasitizing chicken erythrocytes. *Exp Parasitol.* 1973;34(2):220-228.
- 514 14. Dechamps S, Shastri S, Wengelnik K, Vial HJ. Glycerophospholipid acquisition in  
515 *Plasmodium* - a puzzling assembly of biosynthetic pathways. *Int J Parasitol.*  
516 2010;40(12):1347-1365.
- 517 15. Barrett MP. The pentose phosphate pathway and parasitic protozoa. *Parasitol*  
518 *Today.* 1997;13(1):11-16.
- 519 16. Liu J, Guo X, Mohandas N, Chasis JA, An X. Membrane remodeling during  
520 reticulocyte maturation. *Blood.* 2010;115(10):2021-2027.
- 521 17. Dzierzak E, Philipsen S. Erythropoiesis: development and differentiation. *Cold*  
522 *Spring Harb Perspect Med.* 2013;3(4):a011601.
- 523 18. Griffiths RE, Kupzig S, Cogan N, et al. Maturing reticulocytes internalize plasma  
524 membrane in glycophorin A-containing vesicles that fuse with autophagosomes  
525 before exocytosis. *Blood.* 2012;119(26):6296-6306.

- 526 19. Srivastava A, Creek DJ, Evans KJ, et al. Host reticulocytes provide metabolic  
527 reservoirs that can be exploited by malaria parasites. *PLoS Pathog.*  
528 2015;11(6):e1004882.
- 529 20. van Wijk R, van Solinge WW. The energy-less red blood cell is lost: erythrocyte  
530 enzyme abnormalities of glycolysis. *Blood.* 2005;106(13):4034-4042.
- 531 21. Wiback SJ, Palsson BO. Extreme pathway analysis of human red blood cell  
532 metabolism. *Biophys J.* 2002;83(2):808-818.
- 533 22. Chu TTT, Sinha A, Malleret B, et al. Quantitative mass spectrometry of human  
534 reticulocytes reveal proteome-wide modifications during maturation. *Br J*  
535 *Haematol.* 2018;180(1):118-133.
- 536 23. Subramanian G, Babu Rajeev CP, Mohan CD, et al. Synthesis and in vitro  
537 evaluation of hydrazinyl phthalazines against malaria parasite, Plasmodium  
538 falciparum. *Bioorg Med Chem Lett.* 2016;26(14):3300-3306.
- 539 24. Subramanian G, Belekar MA, Shukla A, et al. Targeted Phenotypic Screening in  
540 Plasmodium falciparum and Toxoplasma gondii Reveals Novel Modes of Action  
541 of Medicines for Malaria Venture Malaria Box Molecules. *mSphere.* 2018;3(1).
- 542 25. Kim Y, Shim H, Kim K, Park H, Jang S, Park Y. Profiling individual human red  
543 blood cells using common-path diffraction optical tomography. *Sci Rep.*  
544 2014;4:6659.
- 545 26. Subramanian G, Sadeer A, Mukherjee K, et al. Evaluation of ferrocenyl  
546 phosphines as potent antimalarials targeting the digestive vacuole function  
547 of Plasmodium falciparum. *Dalton Trans.* 2019;48(3):1108-1117.
- 548 27. Picelli S, Faridani OR, Bjorklund AK, Winberg G, Sagasser S, Sandberg R. Full-  
549 length RNA-seq from single cells using Smart-seq2. *Nat Protoc.* 2014;9(1):171-  
550 181.
- 551 28. Ye J, Coulouris G, Zaretskaya I, Cutcutache I, Rozen S, Madden TL. Primer-  
552 BLAST: a tool to design target-specific primers for polymerase chain  
553 reaction. *BMC Bioinformatics.* 2012;13:134.

- 554 29. Rocamora F, Zhu L, Liong KY, et al. Oxidative stress and protein damage  
555 responses mediate artemisinin resistance in malaria parasites. *PLoS Pathog.*  
556 2018;14(3):e1006930.
- 557 30. Pfaffl MW. A new mathematical model for relative quantification in real-time RT-  
558 PCR. *Nucleic Acids Res.* 2001;29(9):e45.
- 559 31. Tong JX, Chandramohanadas R, Tan KSW. High-Content Screening of the  
560 Medicines for Malaria Venture Pathogen Box for Plasmodium falciparum  
561 Digestive Vacuole-Disrupting Molecules Reveals Valuable Starting Points  
562 for Drug Discovery. *Antimicrobial Agents and Chemotherapy.* 2018;62(3).
- 563 32. Shi H, Liu Z, Li A, et al. Life cycle-dependent cytoskeletal modifications in  
564 Plasmodium falciparum infected erythrocytes. *PLoS One.* 2013;8(4):e61170.
- 565 33. Sinha A, Chu TT, Dao M, Chandramohanadas R. Single-cell evaluation of red  
566 blood cell bio-mechanical and nano-structural alterations upon chemically  
567 induced oxidative stress. *Sci Rep.* 2015;5:9768.
- 568 34. Hochmuth RM. Micropipette aspiration of living cells. *J Biomech.* 2000;33(1):15-  
569 22.
- 570 35. Cowman AF, Tonkin CJ, Tham WH, Duraisingh MT. The Molecular Basis of  
571 Erythrocyte Invasion by Malaria Parasites. *Cell Host Microbe.* 2017;22(2):232-  
572 245.
- 573 36. Aniwah Y, Gao X, Hao P, et al. P. falciparum RH5-Basigin interaction induces  
574 changes in the cytoskeleton of the host RBC. *Cell Microbiol.* 2017;19(9).
- 575 37. Li H, Yang J, Chu TT, et al. Cytoskeleton Remodeling Induces Membrane  
576 Stiffness and Stability Changes of Maturing Reticulocytes. *Biophys J.*  
577 2018;114(8):2014-2023.
- 578 38. Blostein R, Grafova E. Factors affecting transport changes associated with  
579 reticulocyte maturation. *Biomed Biochim Acta.* 1987;46(2-3):S172-176.
- 580 39. Wiley JS, Shaller CC. Selective loss of calcium permeability on maturation of  
581 reticulocytes. *J Clin Invest.* 1977;59(6):1113-1119.

- 582 40. Boyle MJ, Richards JS, Gilson PR, Chai W, Beeson JG. Interactions with heparin-  
583 like molecules during erythrocyte invasion by *Plasmodium falciparum*  
584 merozoites. *Blood*. 2010;115(22):4559-4568.
- 585 41. Perkins DJ, Were T, Davenport GC, Kempaiah P, Hittner JB, Ong'echa JM.  
586 Severe malarial anemia: innate immunity and pathogenesis. *Int J Biol Sci*.  
587 2011;7(9):1427-1442.
- 588 42. Goldberg DE. Complex nature of malaria parasite hemoglobin degradation  
589 [corrected]. *Proc Natl Acad Sci U S A*. 2013;110(14):5283-5284.
- 590 43. Muller S, Kappes B. Vitamin and cofactor biosynthesis pathways in *Plasmodium*  
591 and other apicomplexan parasites. *Trends Parasitol*. 2007;23(3):112-121.
- 592 44. Mizuno Y, Kawazu SI, Kano S, Watanabe N, Matsuura T, Ohtomo H. In-vitro  
593 uptake of vitamin A by *Plasmodium falciparum*. *Ann Trop Med Parasitol*.  
594 2003;97(3):237-243.
- 595 45. Acharya P, Garg M, Kumar P, Munjal A, Raja KD. Host-Parasite Interactions in  
596 Human Malaria: Clinical Implications of Basic Research. *Front Microbiol*.  
597 2017;8:889.
- 598 46. Zhang Y, Huang C, Kim S, et al. Multiple stiffening effects of nanoscale knobs on  
599 human red blood cells infected with *Plasmodium falciparum* malaria parasite.  
600 *Proc Natl Acad Sci U S A*. 2015;112(19):6068-6073.
- 601 47. Alampalli SV, Grover M, Chandran S, Tatu U, Acharya P. Proteome and  
602 Structural Organization of the Knob Complex on the Surface of the  
603 *Plasmodium* Infected Red Blood Cell. *Proteomics Clin Appl*.  
604 2018;12(4):e1600177.
- 605 48. Koncarevic S, Rohrbach P, Deponte M, et al. The malarial parasite *Plasmodium*  
606 *falciparum* imports the human protein peroxiredoxin 2 for peroxide detoxification.  
607 *Proc Natl Acad Sci U S A*. 2009;106(32):13323-13328.

- 608 49. Chandramohanadas R, Davis PH, Beiting DP, et al. Apicomplexan parasites co-  
609 opt host calpains to facilitate their escape from infected cells. *Science*.  
610 2009;324(5928):794-797.
- 611 50. Gisselberg JE, Dellibovi-Ragheb TA, Matthews KA, Bosch G, Prigge ST. The suf  
612 iron-sulfur cluster synthesis pathway is required for apicoplast maintenance in  
613 malaria parasites. *PLoS Pathog*. 2013;9(9):e1003655.
- 614 51. Niang M, Bei AK, Madnani KG, et al. STEVOR is a Plasmodium falciparum  
615 erythrocyte binding protein that mediates merozoite invasion and rosetting.  
616 *Cell Host Microbe*. 2014;16(1):81-93.
- 617 52. Rug M, Prescott SW, Fernandez KM, Cooke BM, Cowman AF. The role of  
618 KAHRP domains in knob formation and cytoadherence of P falciparum-infected  
619 human erythrocytes. *Blood*. 2006;108(1):370-378.
- 620 53. Battle KE, Lucas TCD, Nguyen M, et al. Mapping the global endemicity and  
621 clinical burden of Plasmodium vivax, 2000-17: a spatial and temporal modelling  
622 study. *Lancet*. 2019;394(10195):332-343.
- 623 54. Haldar K, Bhattacharjee S, Safeukui I. Drug resistance in Plasmodium. *Nat Rev*  
624 *Microbiol*. 2018;16(3):156-170.
- 625 55. Looareesuwan S, White NJ, Chittamas S, Bunnag D, Harinasuta T. High rate of  
626 Plasmodium vivax relapse following treatment of falciparum malaria in Thailand.  
627 *Lancet*. 1987;2(8567):1052-1055.
- 628 56. Rumball CA, Parsons-Smith BG, Nancekievill L. Sternal puncture in the diagnosis  
629 of malaria. *Lancet*. 1943;242(6268):468-469.
- 630 57. Obaldia N, Meibalan E, Sa JM, et al. Bone Marrow Is a Major Parasite Reservoir  
631 in Plasmodium vivax Infection. *Mbio*. 2018;9(3).
- 632 58. De Niz M, Meibalan E, Mejia P, et al. Plasmodium gametocytes display homing  
633 and vascular transmigration in the host bone marrow. *Science Advances*.  
634 2018;4(5).

- 635 59. Aguilar R, Moraleda C, Achtman AH, et al. Severity of anaemia is associated with  
636 bone marrow haemozoin in children exposed to Plasmodium falciparum. *British*  
637 *Journal of Haematology*. 2014;164(6):877-887.
- 638 60. Smalley ME, Abdalla S, Brown J. The Distribution of Plasmodium-Falciparum in  
639 the Peripheral-Blood and Bone-Marrow of Gambian Children. *Transactions of*  
640 *the Royal Society of Tropical Medicine and Hygiene*. 1981;75(1):103-105.
- 641 61. Rai D, Wilson AM, Moosavi L. Histology, Reticulocytes. StatPearls. Treasure  
642 Island (FL); 2019.
- 643 62. Trager W. Coenzyme A and the antimalarial action in vitro of antipantothenate  
644 against Plasmodium lophurae, P. coatneyi and P. falciparum. *Trans N Y*  
645 *Acad Sci*. 1966;28(8):1094-1108.
- 646 63. Hart RJ, Cornillot E, Abraham A, et al. Genetic Characterization of Plasmodium  
647 Putative Pantothenate Kinase Genes Reveals Their Essential Role in  
648 Malaria Parasite Transmission to the Mosquito. *Sci Rep*. 2016;6:33518.
- 649 64. Diez-Silva M, Park Y, Huang S, et al. Pf155/RESA protein influences the dynamic  
650 microcirculatory behavior of ring-stage Plasmodium falciparum infected red blood  
651 cells. *Sci Rep*. 2012;2:614.
- 652 65. Sanyal S, Egee S, Bouyer G, et al. Plasmodium falciparum STEVOR proteins  
653 impact erythrocyte mechanical properties. *Blood*. 2012;119(2):e1-8.
- 654 66. Glenister FK, Coppel RL, Cowman AF, Mohandas N, Cooke BM. Contribution of  
655 parasite proteins to altered mechanical properties of malaria-infected red  
656 blood cells. *Blood*. 2002;99(3):1060-1063.
- 657 67. Tilly AK, Thiede J, Metwally N, et al. Type of in vitro cultivation influences  
658 cytoadhesion, knob structure, protein localization and transcriptome profile of  
659 Plasmodium falciparum. *Sci Rep*. 2015;5:16766.
- 660 68. Totino PR, Lopes SC. Insights into the Cytoadherence Phenomenon of  
661 Plasmodium vivax: The Putative Role of Phosphatidylserine. *Front Immunol*.  
662 2017;8:1148.



- 663 69. Kanjee U, Gruring C, Chaand M, et al. CRISPR/Cas9 knockouts reveal genetic  
664 interaction between strain-transcendent erythrocyte determinants of *Plasmodium*  
665 *falciparum* invasion. *Proc Natl Acad Sci U S A*. 2017;114(44):E9356-E9365.
- 666 70. Satchwell TJ, Wright KE, Haydn-Smith KL, et al. Genetic manipulation of cell line  
667 derived reticulocytes enables dissection of host malaria invasion  
668 requirements. *Nat Commun*. 2019;10(1):3806.

669

## 670 **Figure legends**

671

### 672 **Figure- 1. Purification and characterisation of CD71<sup>+</sup> and CD71<sup>-</sup> red blood cells. A.**

673 CD71<sup>+</sup> reticulocytes were purified from cord blood using Magnetic-activated cell sorting  
674 (MACS) protocol. Isolated sub-fractions were inspected through sub vital staining (Top)  
675 and differential interference microscopy (Bottom). **B.** Immunofluorescence microscopy  
676 confirmed abundant localisation of CD71 on immature reticulocytes (magnet-bound  
677 fraction). Cells were stained with Cell Mask<sup>TM</sup> Red (Thermo Fisher Scientific) and  $\alpha$ -  
678 CD71 antibody (Green). **C.** Western blotting showed robust purification of CD71<sup>+</sup>  
679 reticulocytes. Probing was performed with  $\alpha$ -CD71 antibody (1:1000, Abcam), with  
680 GAPDH (1:1000, Abcam) serving as loading control.

681

### 682 **Figure- 2. Comparison of *P. falciparum* infection in CD71<sup>+</sup> and CD71<sup>-</sup> blood cells.**

683 **A.** Approximately 2-fold higher infection of *P. falciparum* was observed when CD71<sup>+</sup>  
684 reticulocytes (purple) were used as host cells. (Mean values of 2 independent  
685 experiments; CD71<sup>+</sup>: 10.52% and CD71<sup>-</sup>: 5.08%). An unpaired two-tailed t-test was  
686 performed to confirm statistical reliability. **B.** Merozoite counts were taken from late stage  
687 segmented schizonts through fluorescence microscopy, which showed comparable  
688 values irrespective of the host cells used for infection (Mean values of 2 independent  
689 experiments; CD71<sup>-</sup>: 24.28 and CD71<sup>+</sup>: 24.80). **C.** Parasites grown in CD71<sup>+</sup>

690 reticulocytes for one cycle were re-introduced to CD71<sup>-</sup> cells, which showed invasion  
691 rates similar to controls, suggesting merozoite production is not increased during  
692 development inside reticulocytes. **D.** Higher amounts of reticulocytes in the culture wells  
693 resulted in increased infection rate *in vitro*. However, maximum infection was achieved  
694 only in a pure CD71<sup>+</sup> reticulocyte population. **D.** Invasion efficiency comparison in  
695 presence of varying amounts of anti-basigin antibody, saturating levels of the antibody  
696 showed differential effects on reticulocyte invasion while completely blocking *P.*  
697 *falciparum* invasion into normocytes.

698

699 **Figure- 3. Holotomography measurements demonstrate that CD71<sup>+</sup> reticulocytes**  
700 **are larger and multi-lobular. A.** Representative holotomography images of CD71<sup>+</sup> and  
701 CD71<sup>-</sup> cells demonstrating comparative cellular morphologies. Using Tomocube HT-1,  
702 we derived quantitative dynamic cell measurements on **B.** Refractive index (Mean  
703 values of 20 cells; CD71<sup>-</sup>: 1.37 and CD71<sup>+</sup>: 1.40) and **C.** surface area (Mean values of  
704 20 cells; CD71<sup>-</sup>: 238.00 $\mu\text{m}^2$  and CD71<sup>+</sup>: 267.75 $\mu\text{m}^2$ ). These measurements revealed that  
705 CD71<sup>+</sup> reticulocytes are ~20% larger than normocytes.

706

707 **Figure- 4. *P. falciparum* grown in CD71<sup>+</sup> reticulocytes show different sensitivity to**  
708 **artemisinin family drugs.** Growth inhibition assays against 3D7 parasites infected into  
709 distinct host cell populations was conducted. Infected cells were incubated with  
710 antimalarials at the early trophozoite stage (32 to 36 hpi) and parasitemia was manually  
711 counted (5000 cells) in the next cycle of trophozoite stage. The experimental data  
712 represents the mean of 3 independent experiments performed in replicates. Figure  
713 shows the log (inhibitor)-versus-response curves for potent antimalarials on *P.*  
714 *falciparum* infected CD71<sup>+</sup> and CD71<sup>-</sup> cells for **A.** artemisinin, **B.** dihydroartemisinin, **C.**  
715 cycloheximide and **D.** chloroquine.

716

717 **Figure- 5: Schematic representation of parasite adaptation and enrichment**  
718 **strategy adopted for 100- cell microarray analysis.** *P. falciparum* schizonts were  
719 allowed to invade into cord blood normocytes (for 3 continuous cycles), CD71<sup>+</sup>  
720 reticulocytes (for 1 cycle) and in CD71<sup>+</sup> reticulocytes for 3 consecutive cycles. For the  
721 third condition, schizonts in every cycle was purified and re-introduced into freshly  
722 purified reticulocytes (to avoid any invasion to normocytes resulting from maturation  
723 while in culture) from the same batch of blood. After staining with Hoechst, 100-infected  
724 cells were isolated by FACS sorting and subsequent microarray analysis.

725

726 **Figure- 6: Differential Gene expression profiles in *P. falciparum* adapted in human**  
727 **reticulocytes.** Expression profiles of genes in *P. falciparum* adapted into CD71<sup>+</sup> and  
728 CD71<sup>-</sup> cells. **A.** 100 infected cells from CD71<sup>-</sup> cultures (3 cycles), and CD71<sup>+</sup> cultures (1  
729 cycle and 3 cycle) were isolated through FACS sorting, flow plots demonstrating gating  
730 and purity of cells (top panel). Uninfected/healthy cells were used as negative control for  
731 gating (bottom). **B.** Upon completing microarray analysis, a Z-score cut-off of 2 was  
732 applied to only assess genes, which showed stable difference between the two  
733 conditions when comparing both biological replicates. List of genes which are more than  
734 2-fold up or down-regulated when comparing CD71<sup>-</sup> host cells to CD71<sup>+</sup> reticulocytes  
735 cycle 1 or cycle 3 was obtained. This analysis gave 156 genes different between  
736 normocytes versus reticulocytes in 1 cycle and 159 genes different between CD71<sup>-</sup>  
737 versus CD71<sup>+</sup> in 3 cycles represented in the above heatmap (based on Euclidean  
738 distance) shows the expression for these differentially expressed genes in the three  
739 conditions compared. Red represents up-regulated genes, purple represents down-  
740 regulated genes and white represents no change in expression. (CD71<sup>-</sup> refers to  
741 normocytes, 3 cycles, 5 replicates; R1: refers to CD71<sup>+</sup>, 1 cycle, 5 replicates; R3 refers  
742 to CD71<sup>+</sup>, 3 cycles, 5 replicates). **C.** Based on microarray data, the differential  
743 expression of six selected genes were confirm by quantitative real-time PCR: *KAHRP*  
744 (PF3D7\_0202000), *stevor* (PF3D7\_0222800), *var* (PF3D7\_0632500), *pantothenate*

745 *transporter* (PF3D7\_0206200), *phosphopantetheine adenyltransferase*  
746 (PF3D7\_0704700) and cysteine desulfuration SufE (PF3D7\_0206100) confirming  
747 microarray results. Normalised quantitative expression to *arginyl-tRNA synthetase* was  
748 compared between infected CD71<sup>-</sup> (control) and infected CD71<sup>+</sup> (treatment). The graphs  
749 show two data points from two independent biological experiments.

750

751 **Figure- 7: Host cell remodelling in *P. falciparum* infected reticulocytes is altered**  
752 **through differential gene expression. A.** Membrane of *P. falciparum* infected  
753 reticulocytes (CD71<sup>+</sup>) remain stiff during early parasite development, as measured  
754 through micropipette aspiration technique. Briefly, 30-40 cells were obtained per  
755 measurement for individual experiments. The cellular membrane was monitored by  
756 Olympus IX71 microscope and image was processed by QCapture Pro 6.0 and the  
757 elastic shear modulus was determined using the Hochmuth model. **B.** Surface view of  
758 infected CD71<sup>-</sup> and infected CD71<sup>+</sup> cells scanned by AFM showing an area of 1µm on a  
759 representative cell, indicating reduced knob formation in infected CD71<sup>+</sup> reticulocytes. **C.**  
760 Reduced KAHRP expression on infected CD71<sup>+</sup> cells was validated through Amnis  
761 Imaging flow cytometry. Infected cells were labeled with anti-KAHRP antibody and  
762 stained with secondary anti-mouse FITC antibody together with Hoechst. Background  
763 FITC fluorescence was deducted from doubly-stained uninfected healthy cells: CD71<sup>-</sup>  
764 and CD71<sup>+</sup>, as appropriate. Graphs shows results from three independent experiments.

765

766

767 **Supplemental Table. 1: IC<sub>50</sub> values for *P. falciparum* grown under two host**  
768 **conditions against selected antimalarial drugs.**

769

770 **Supplemental Table. 1: A list of genes with corresponding PCR primers used for**  
771 **qPCR experiments**

772

773 **Supplementary Figure-1. *P. falciparum*- infected red cells remain CD71<sup>+</sup> until**  
774 **parasites progress into late rings/early trophozoites. A.** CD71<sup>+</sup> samples were  
775 stained with anti-CD71 antibody at 1:100 and secondary antibody (Alexa Fluor 488 at  
776 1:200). Differential interference microscopy (DIC) show morphological characteristics of  
777 reticulocytes still present at ~24 h. **B.** Fluorescence intensity of stage specific depletion  
778 of CD71 on uninfected CD71<sup>+</sup> verses infected CD71<sup>+</sup> reticulocytes ('+' indicated  
779 presence of fluorescence, '-' indicated absence of fluorescence; based on 1000 infected  
780 cells). Samples were imaged on coverslips and captured at 100x oil magnification using  
781 a CKX53 Olympus microscope. **C.** Sub vital stain of cells at specific stages of infection  
782 (ring ~18 to 24 h), trophozoite (~24 to 36 h) and schizont (~ 40 to 44 h) show absence of  
783 RNA (green arrow) in infected while uninfected CD71<sup>+</sup> cells still harbour reticular matter  
784 (red arrows). (ui: uninfected ; i: infected). Bar graph depiction of the premature loss of  
785 CD71 on infected reticulocytes in comparison to uninfected reticulocytes.

786

787 **Supplementary Figure-2. Surface expression of known host receptors required for**  
788 ***P. falciparum* invasion** (Results originating from Mass spectrometry data, reported in  
789 Chu *et al*, 2018).

790

791 **Supplementary Figure-3. Differential sensitivity of antimalarial drugs between**  
792 **infected reticulocytes and infected normocytes is not caused by differences in the**  
793 **invasion rates.** Seeding cultures for both infected host cells were reduced to the same  
794 parasitemia of 1% followed by treatment of antimalarials **A.** artemisinin **B.**  
795 dihydroartemisinin **C.** cycloheximide and **D.** chloroquine at IC<sub>50</sub> and IC<sub>80</sub> concentrations  
796 at early trophozoite stage and parasitemia was manually counted in the next cycle of  
797 trophozoite stage (32 to 36 h post invasion).

798

799 **Supplementary Figure- 4. Pathway enrichment results demonstrating altered**  
800 **metabolism and host cell remodelling in (A) parasites grown for 1 cycle in CD71<sup>+</sup>**  
801 **reticulocytes and (B) parasites grown for 3 continuous cycles in reticulocytes.**

802

803 **Supplementary Figure- 5: Relative mRNA levels of interesting candidate genes**  
804 **across 3 cycles of host cell switching (N-R1) and adaptation (R1-R3) Genes such as**  
805 **(A) var (PF3D7\_1255200), (B) KAHRP, (C) Pantothenate transporter and (D) orotate**  
806 **phosphoribosyl transferase are highlighted. Transcript levels were measure by qPCR and**  
807 **shown as normalised relative quantity to internal control *arginyl-tRNA synthetase* gene.**  
808 **Results were from one biological experiment of the RNA sample used for microarray**  
809 **data.**

810

811 **S6. Representative images of infected CD71<sup>+</sup> and CD71<sup>-</sup> red cells obtained from**  
812 **Imaging flow cytometry, demonstrating reduced fluorescence signal in infected**  
813 **CD71- host cells.**

814

815 **S7. Surface patterns of healthy (un-infected) CD71<sup>+</sup> and CD71<sup>-</sup> red blood cells,**  
816 **used as controls for studying the presence of knobs.**

817 **S8: Genes identified and fold difference from the Microarray experiments**

818

819 **Authorship Contributions**

820

821 **RN, TTTC, JT, YH, GS, JXT, PT and KF carried out laboratory work and collected**  
822 **and analyzed the data; JC** provided clinical management of cord blood related aspects,  
823 **ethical clearance, and collection and processing of the blood samples; RN, TTTC, JT,**  
824 **HY, GS, JXT, PT, KF, KST, CT, JC and ZB** participated in data interpretation and  
825 **helped to draft the manuscript; RC** designed the study, coordinated the project and wrote

826 the manuscript. The funders had no role in study design, data collection and analysis,  
827 decision to publish, or preparation of the manuscript.

828

829

# Figure. 1

**A** bioRxiv preprint doi: <https://doi.org/10.1101/862169>; this version posted December 2, 2020. The copyright holder for this preprint (which was not certified by peer review) is the author/funder, who has granted bioRxiv a license to display the preprint in perpetuity. It is made available under aCC-BY 4.0 International license.

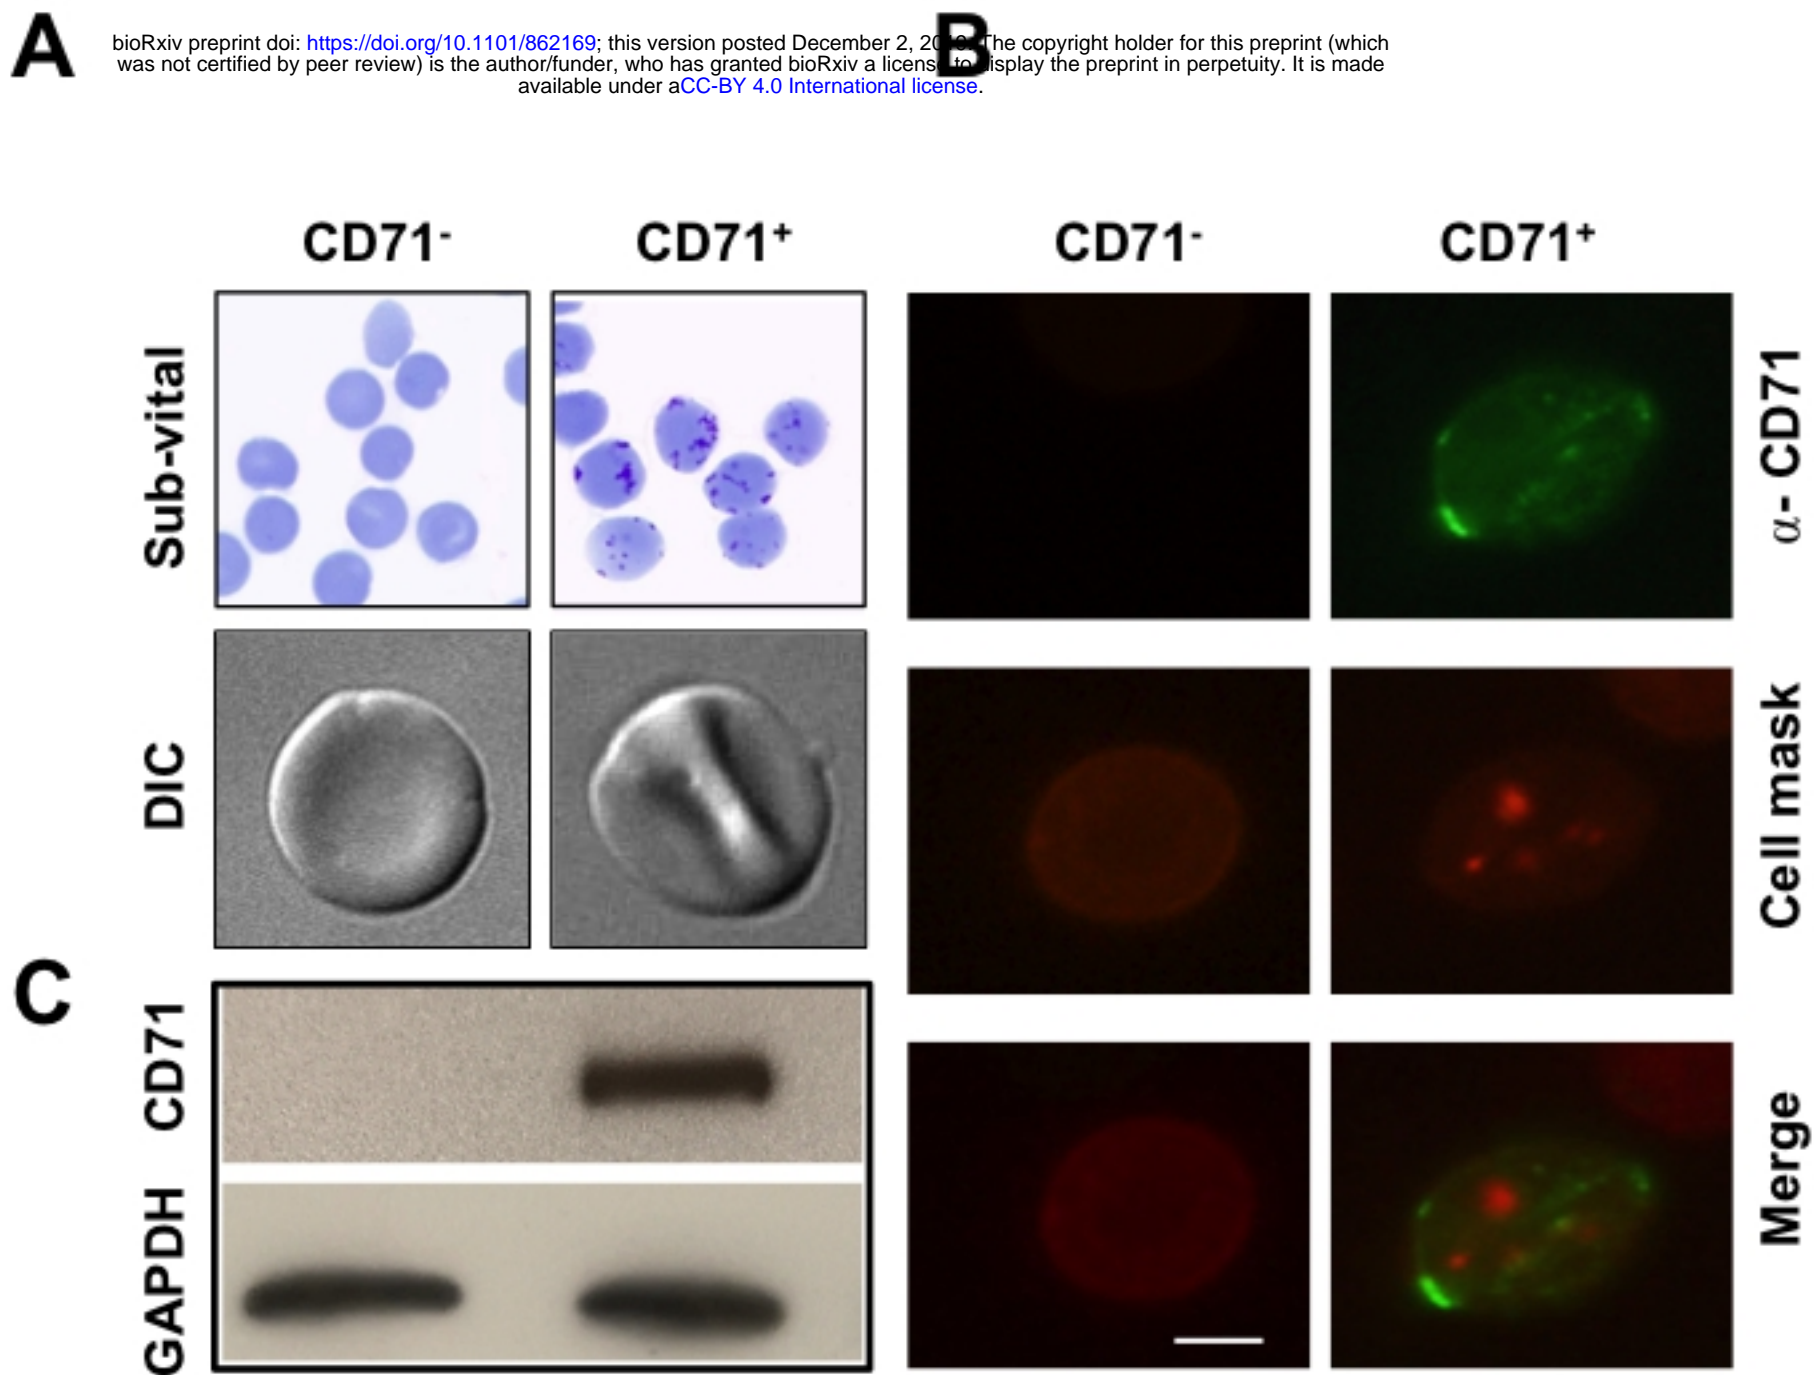



# Figure. 2

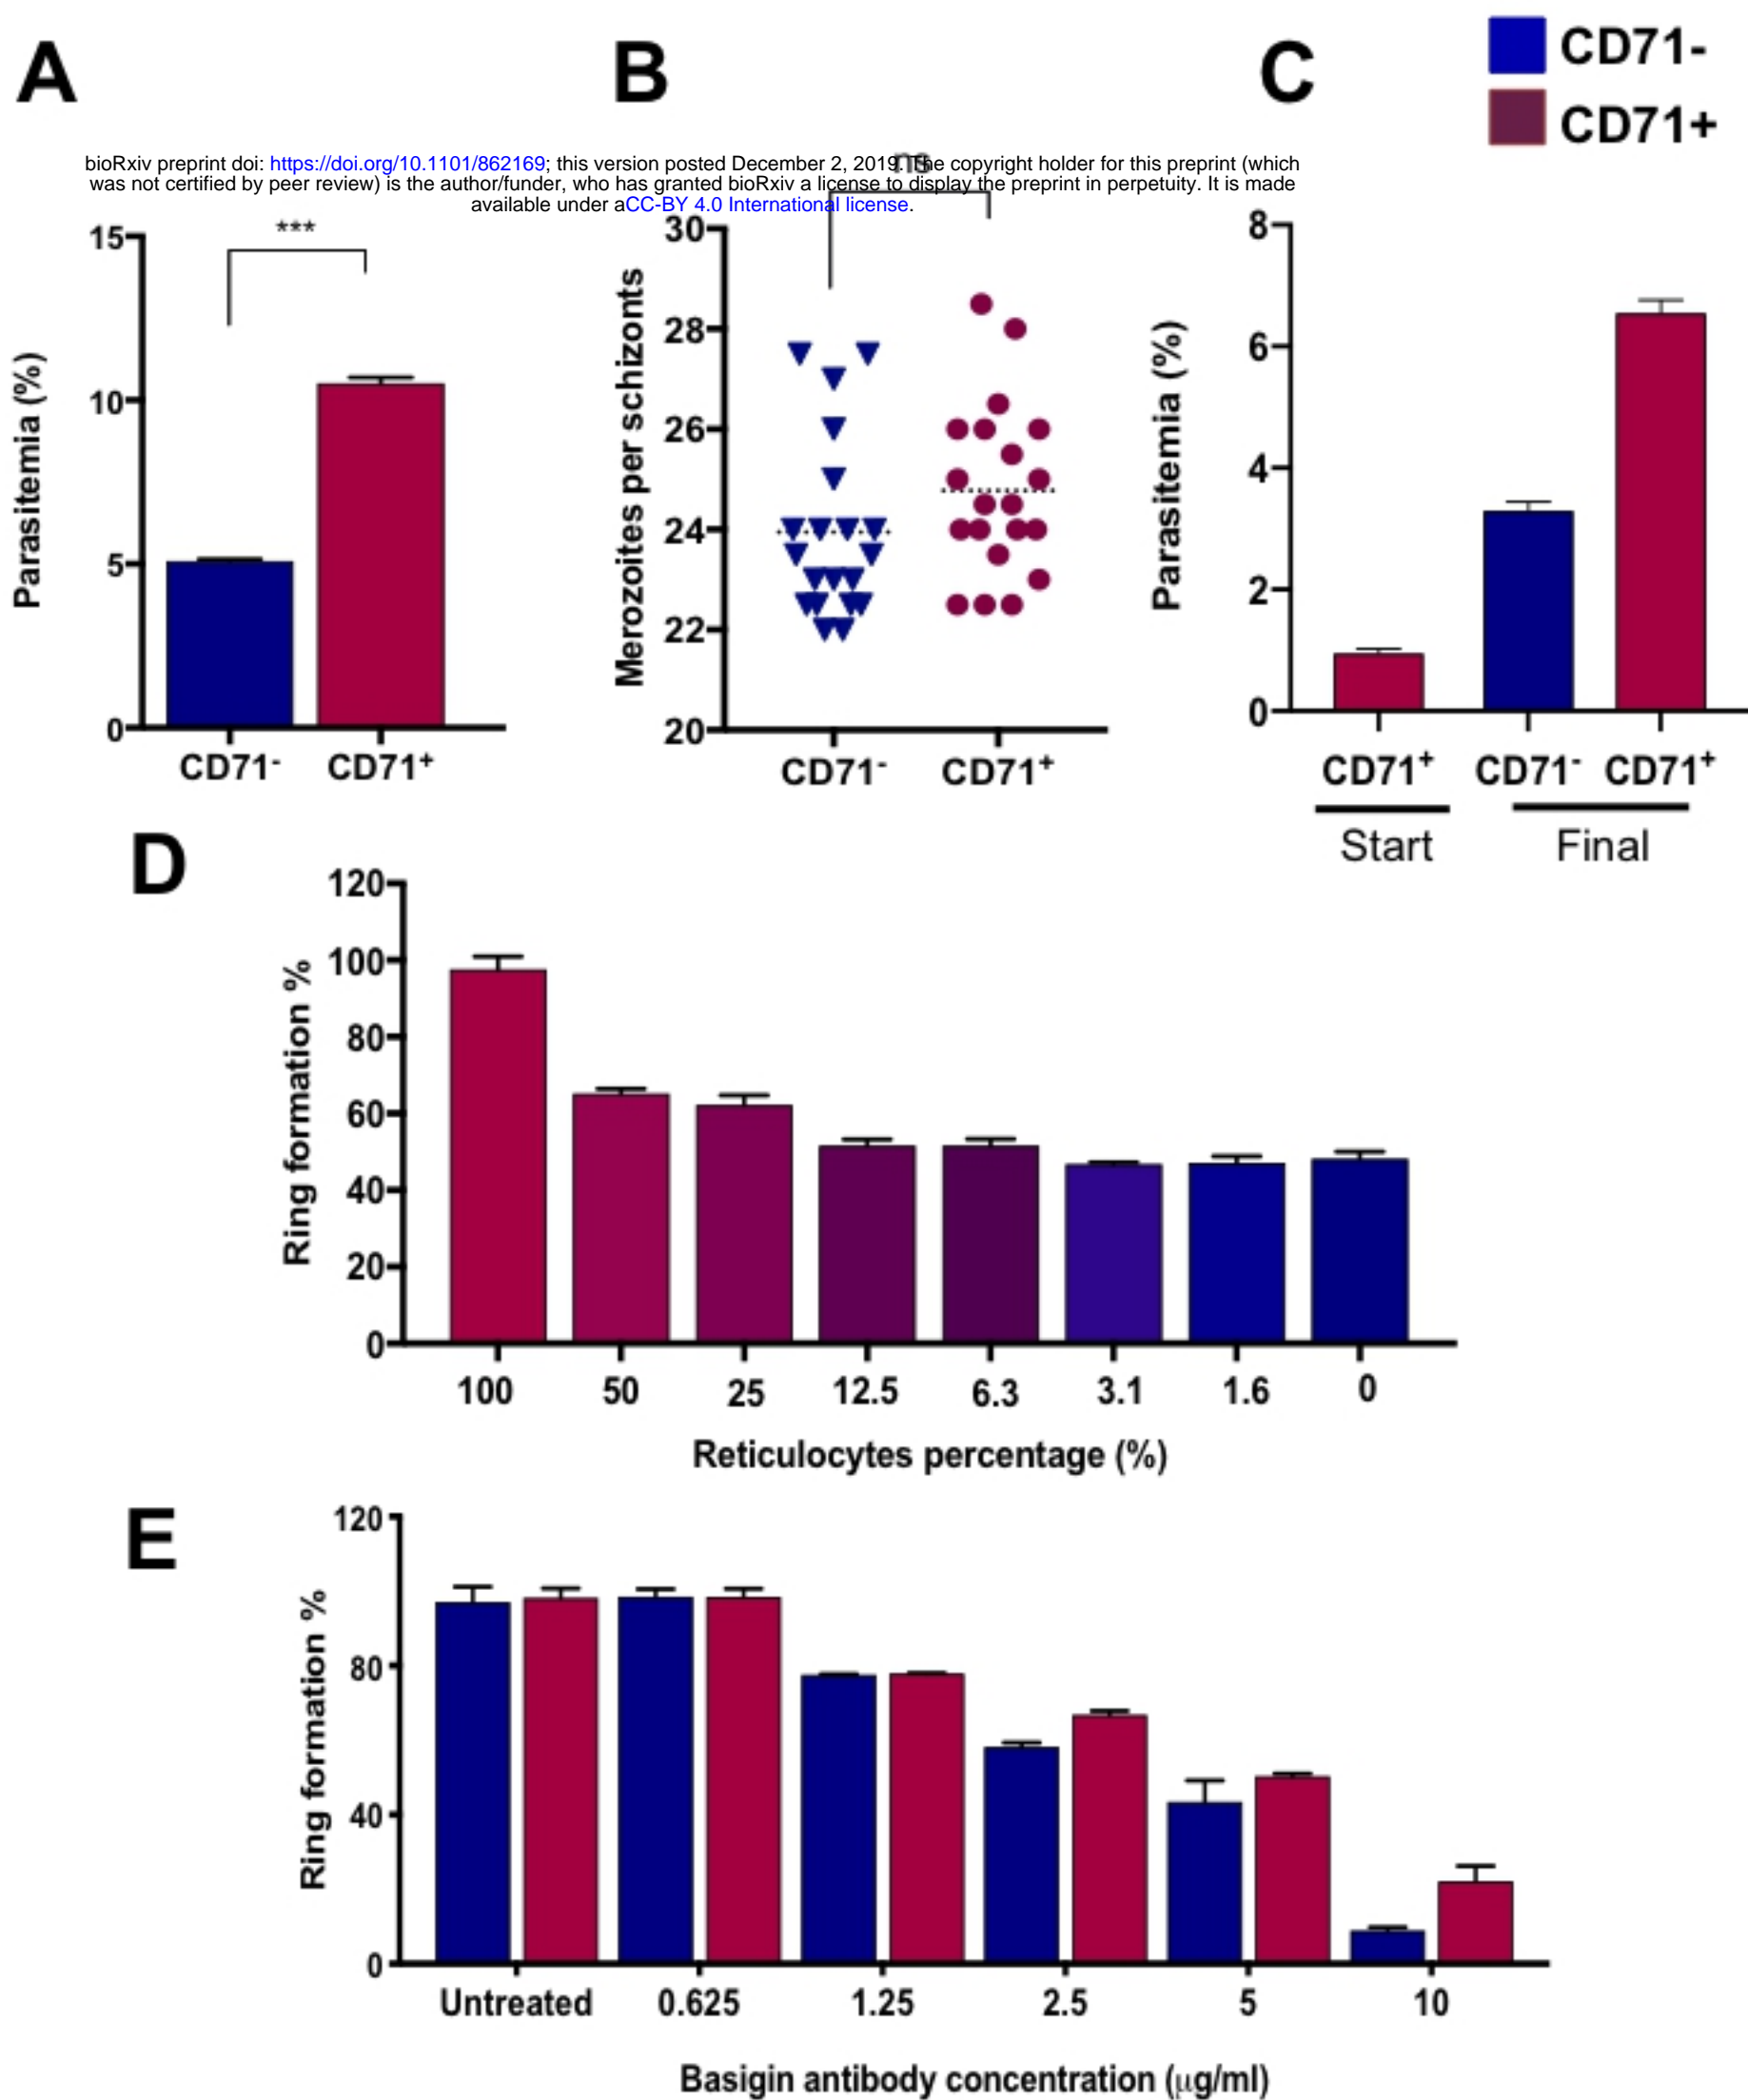

Figure. 2

# Figure. 3

## A

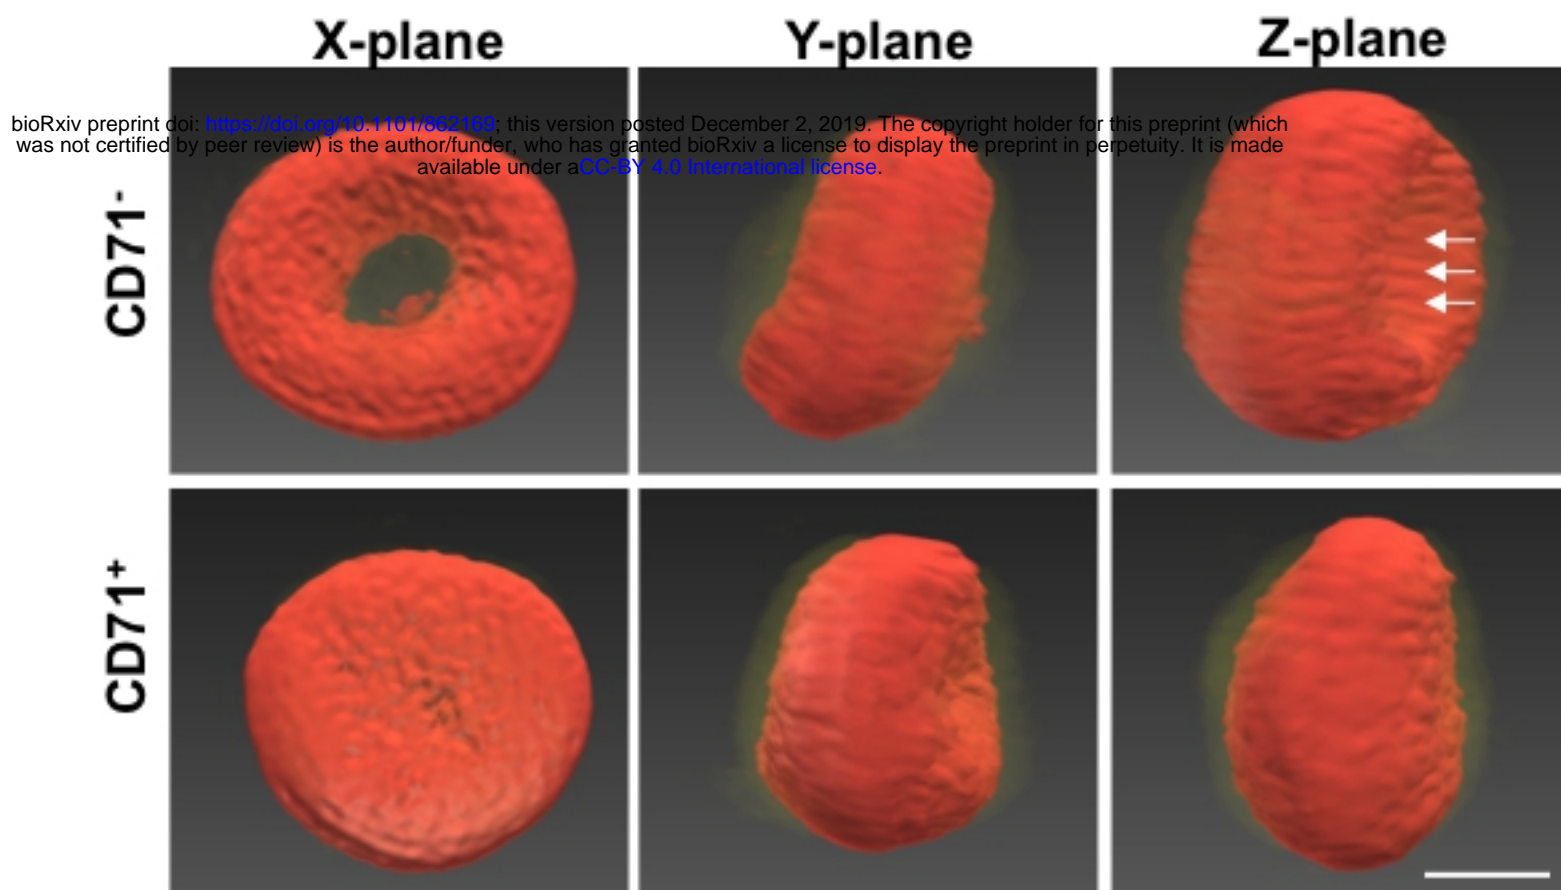

## B

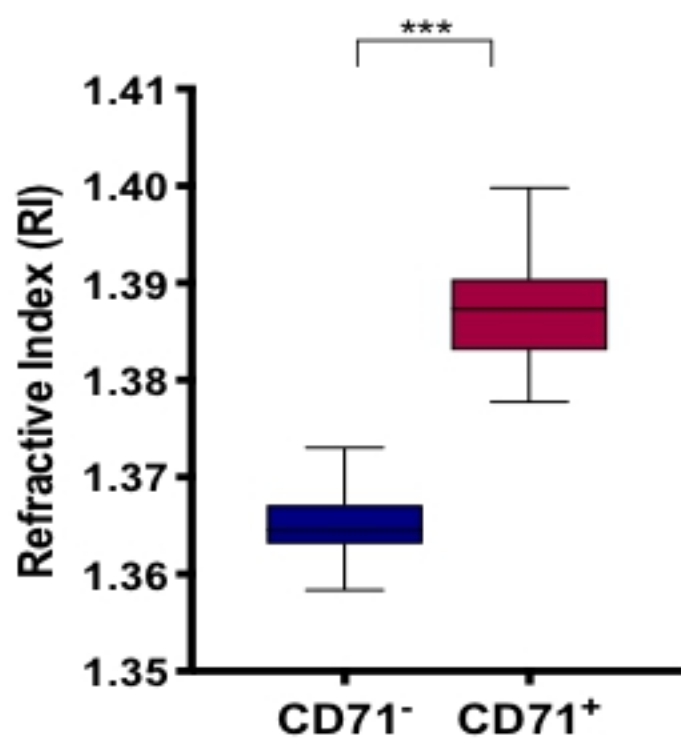

## C

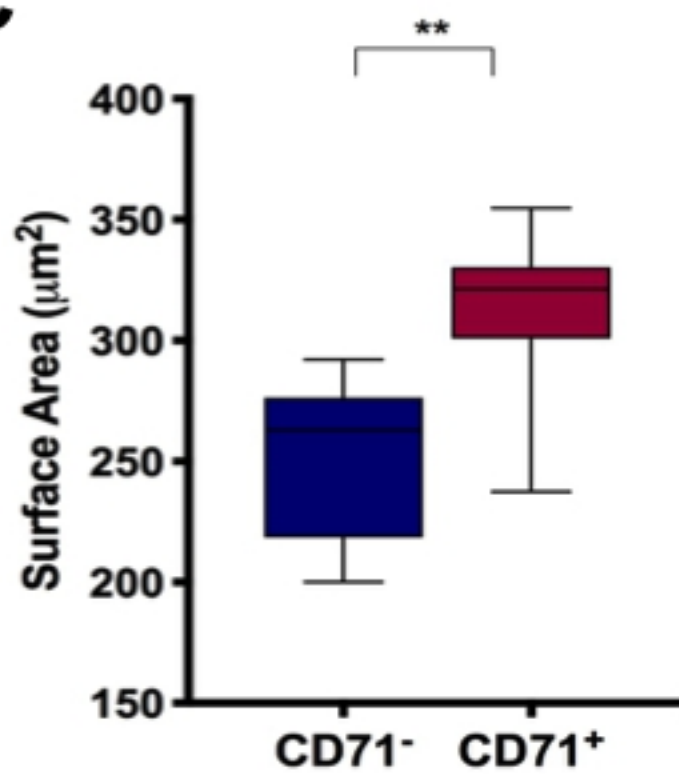

# Figure. 4

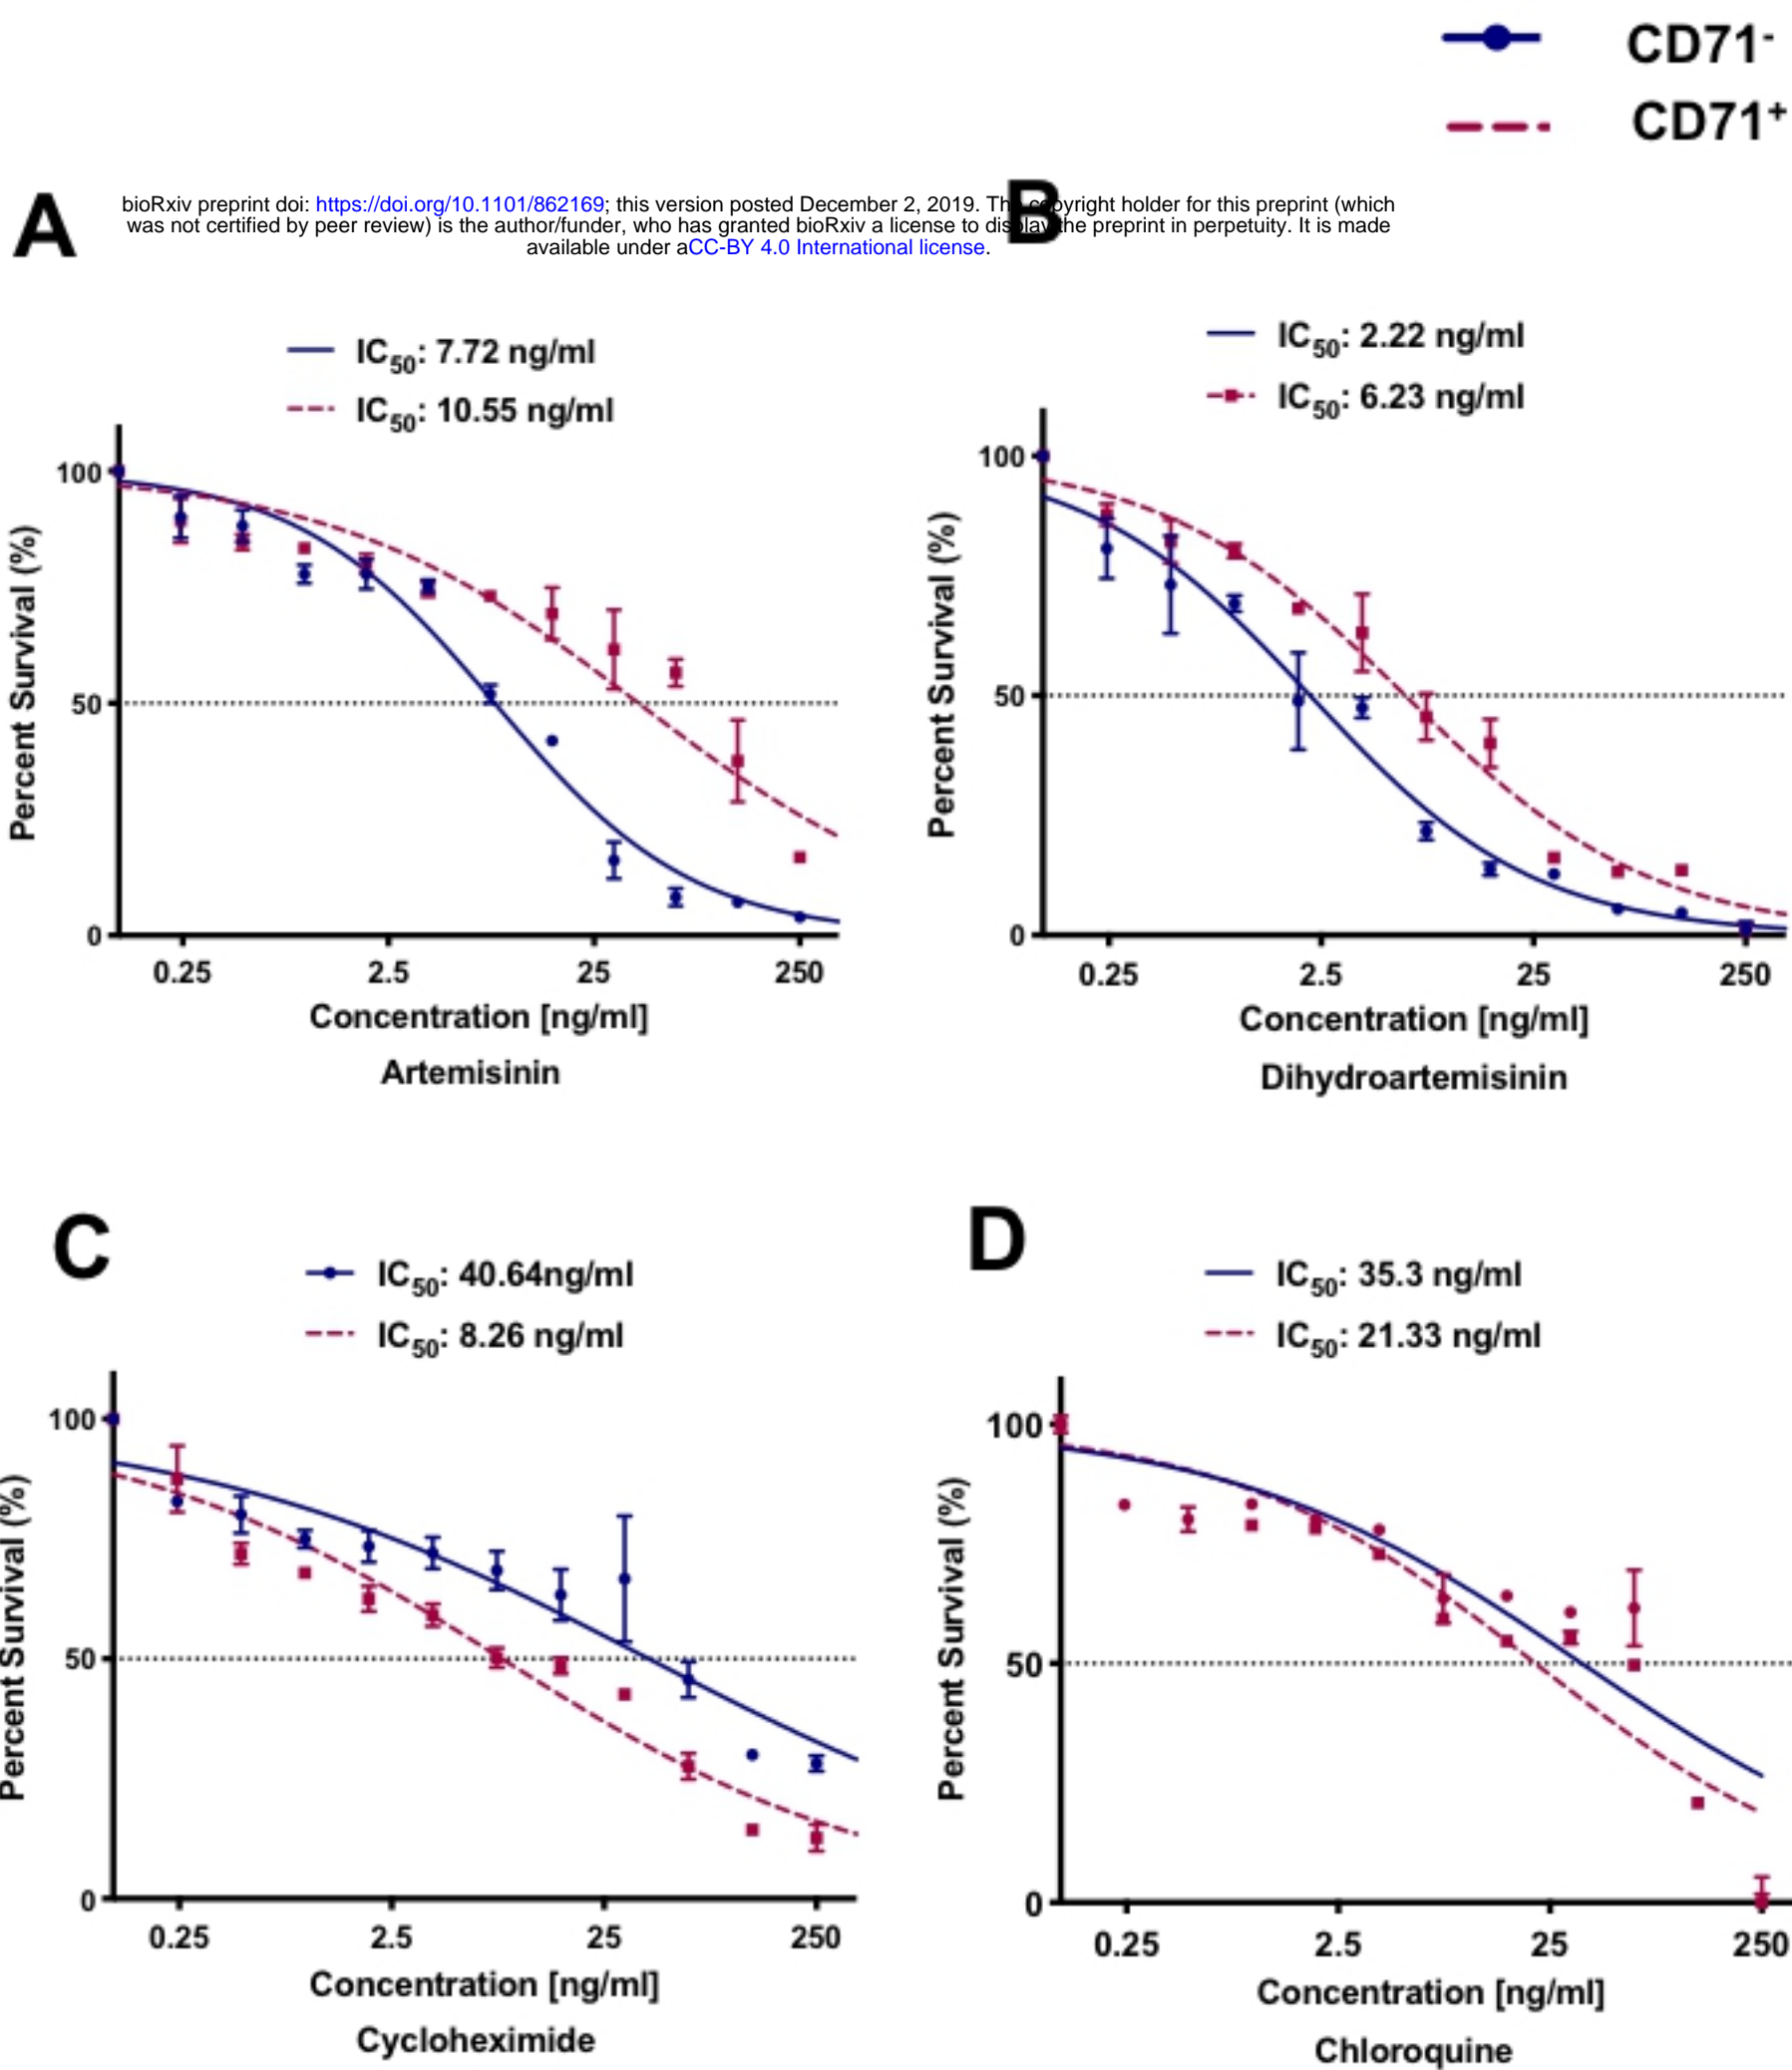

Figure. 4

# Figure. 5

bioRxiv preprint doi: <https://doi.org/10.1101/862169>; this version posted December 2, 2019. The copyright holder for this preprint (which was not certified by peer review) is the author/funder, who has granted bioRxiv a license to display the preprint in perpetuity. It is made available under aCC-BY 4.0 International license.

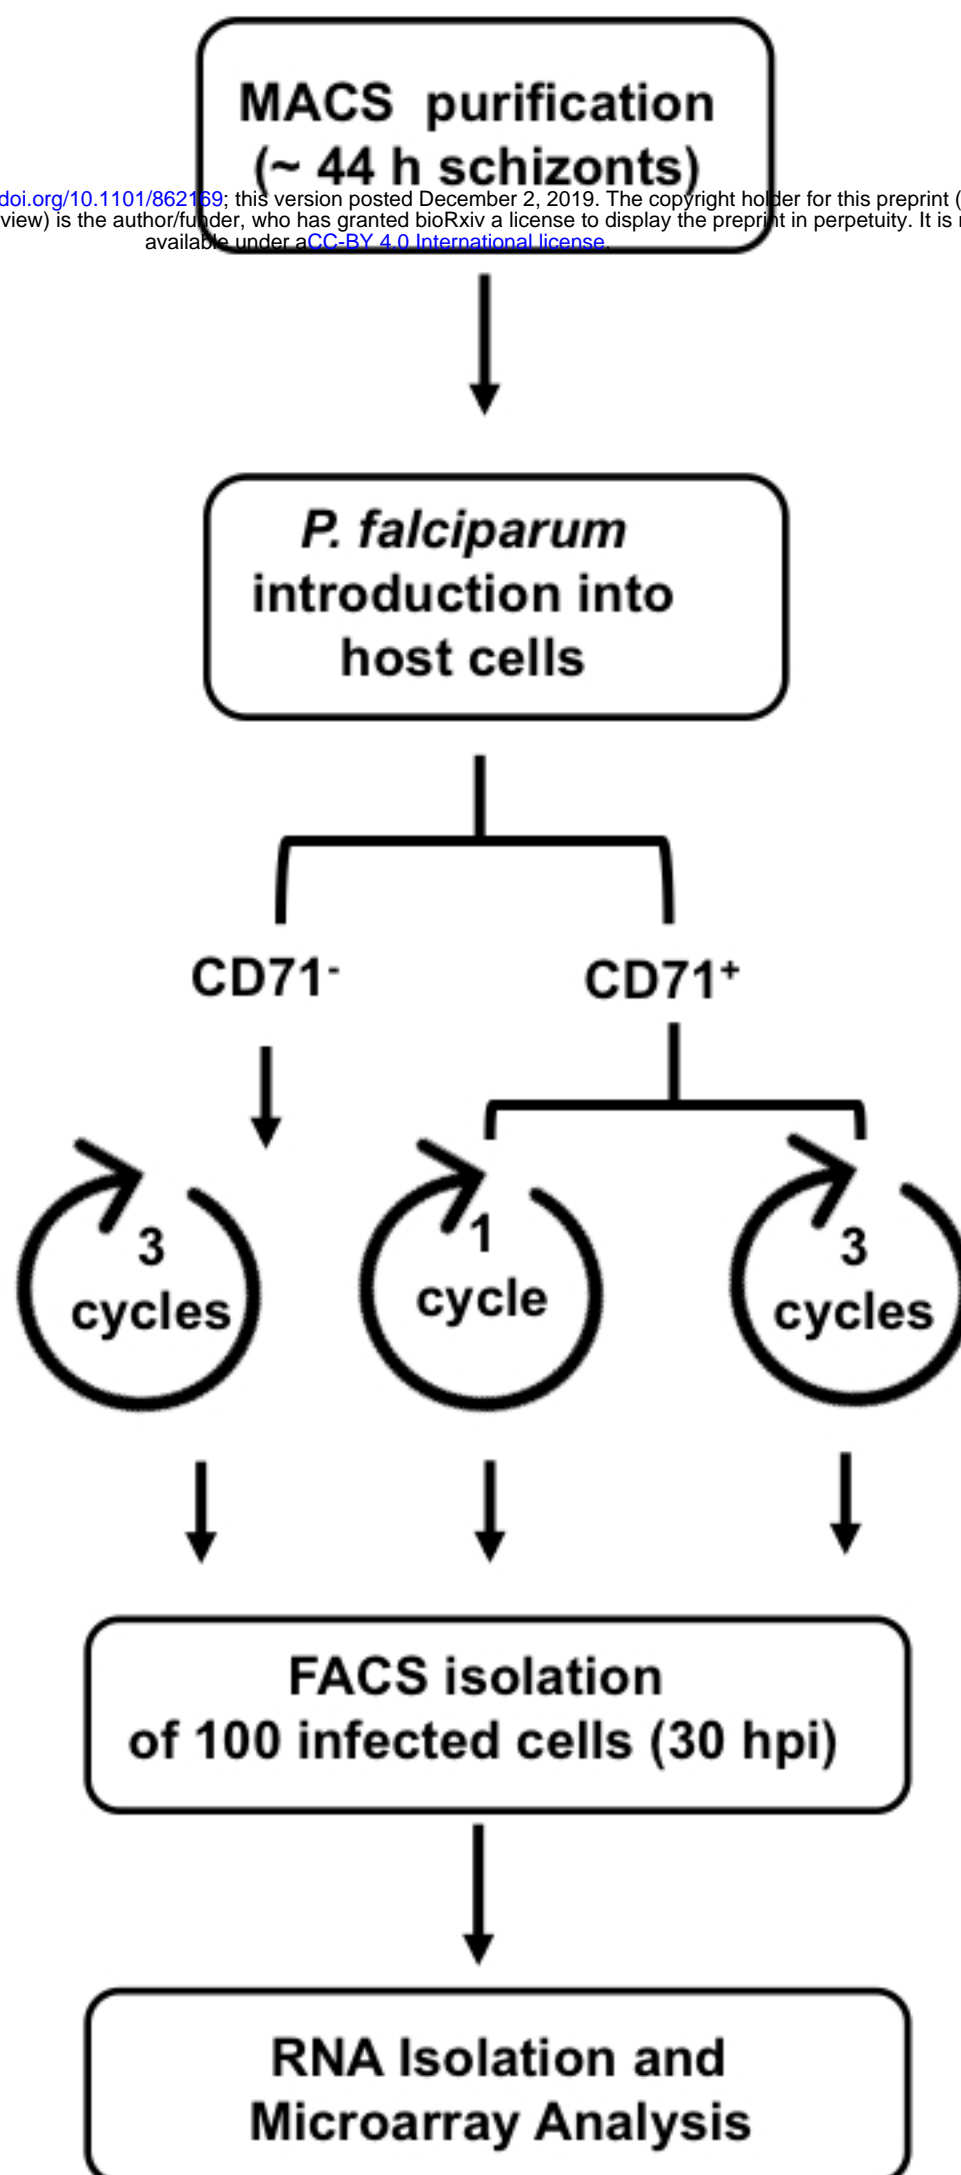

Figure. 5

# Figure. 6

## A

Infected cells

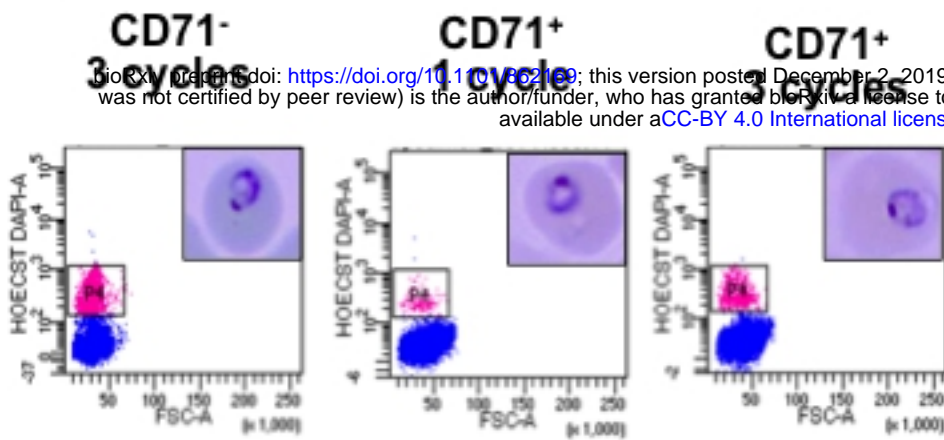

Uninfected cells

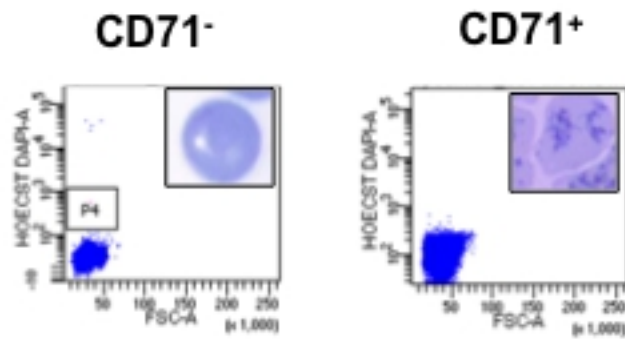

## C

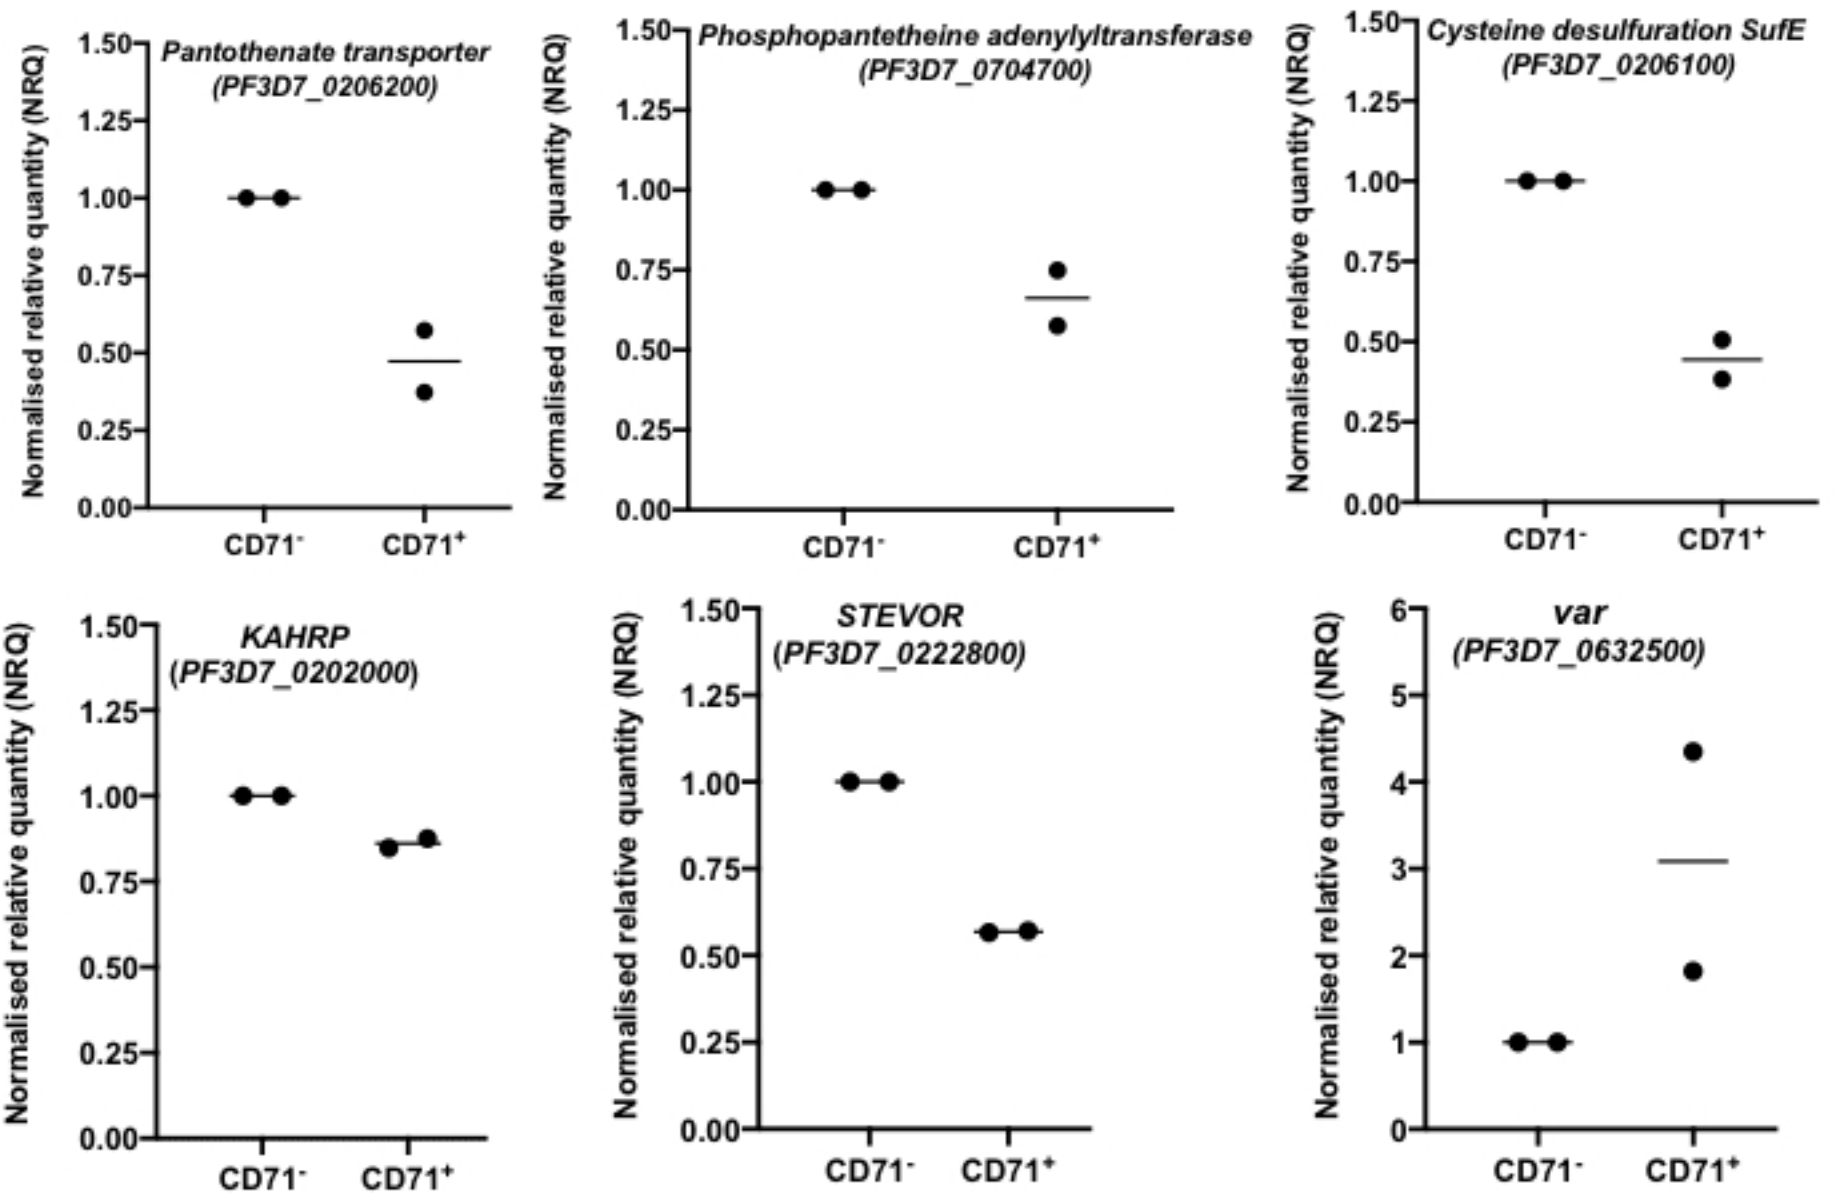

## B

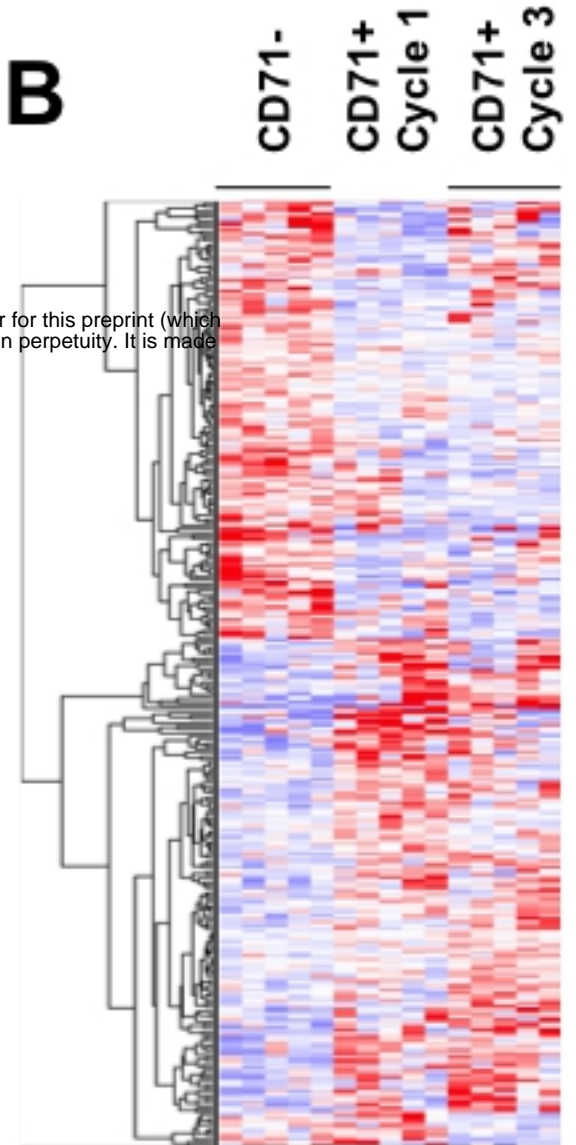

Figure. 6

# Figure. 7

**A**

bioRxiv preprint doi: <https://doi.org/10.1101/862169>; this version posted December 2, 2019. The copyright holder for this preprint (which was not certified by peer review) is the author/funder, who has granted bioRxiv a license to display the preprint in perpetuity. It is made available under aCC-BY 4.0 International license.

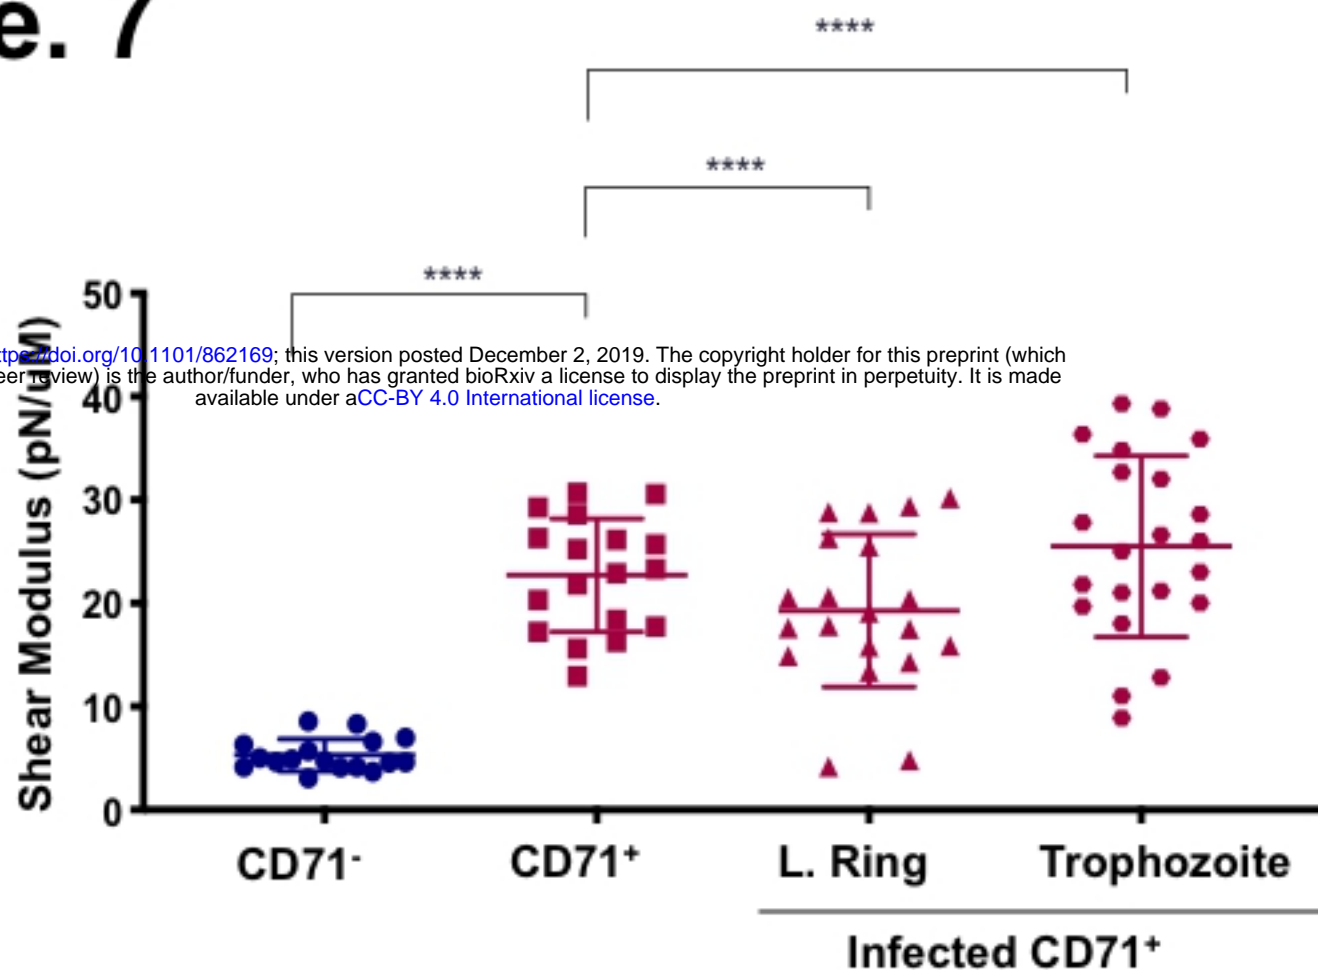

**B**

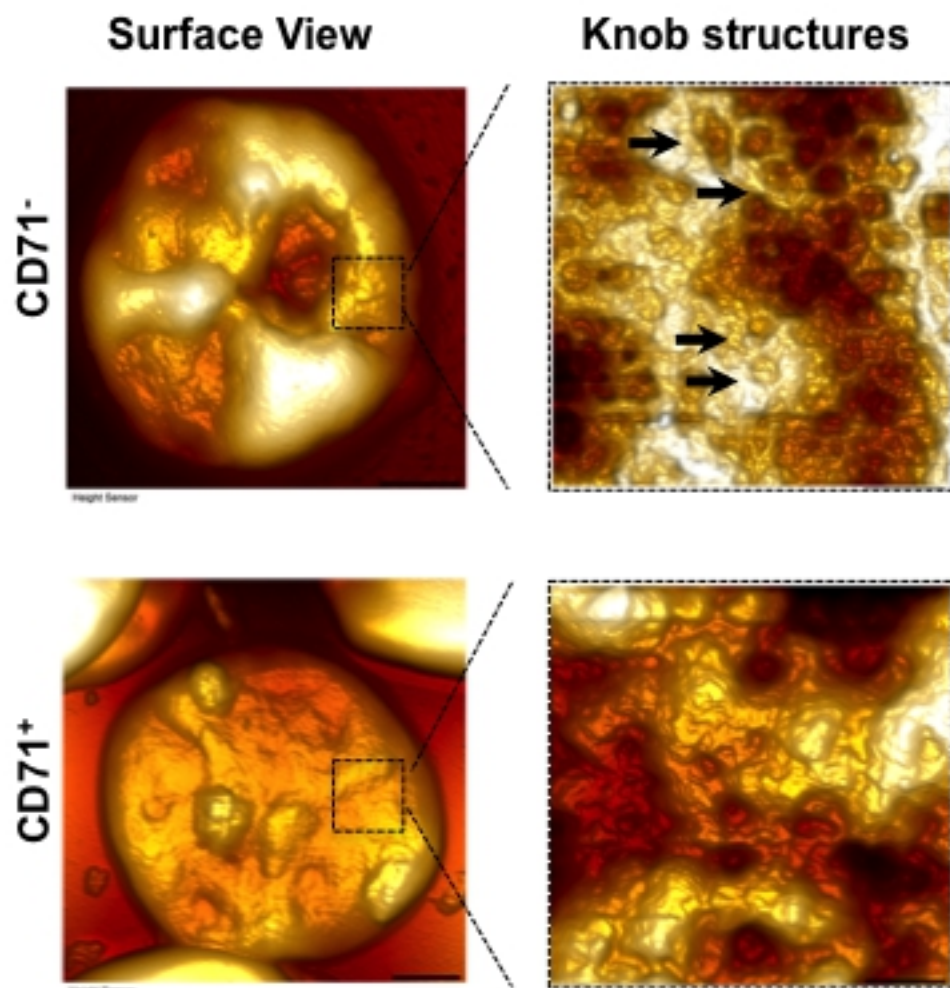

**C**

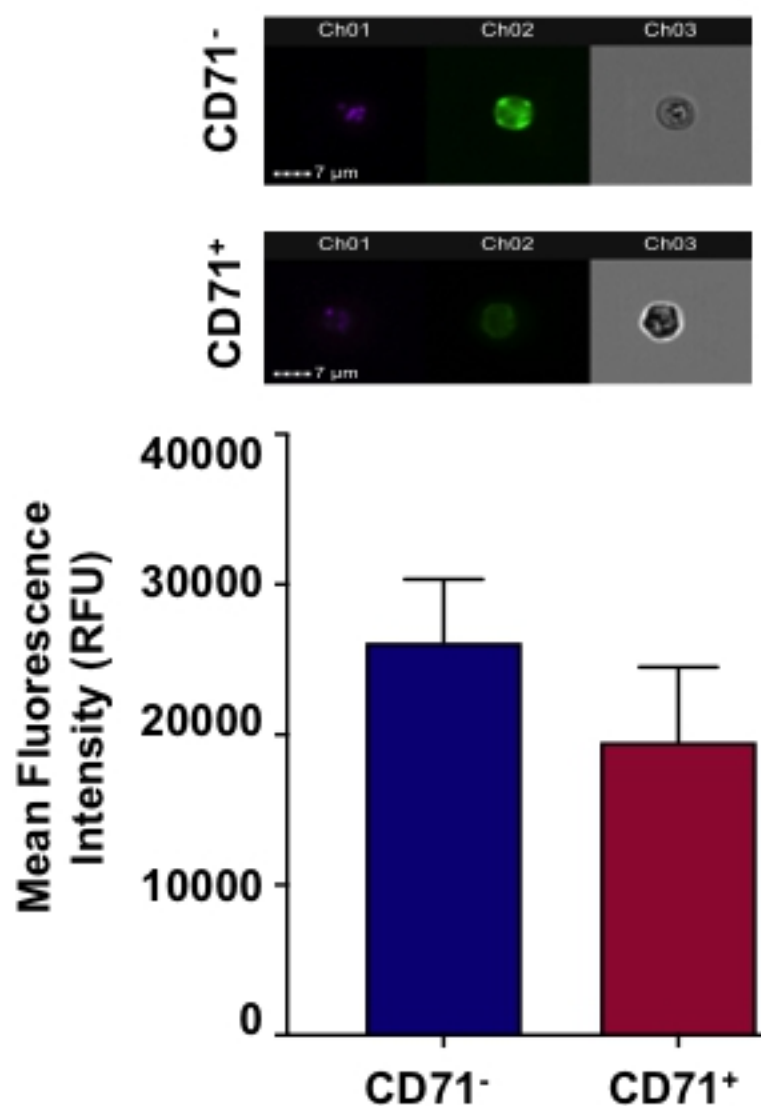

Source: https://www.biorxiv.org/content/biorxiv/early/2019/12/02/862169.full.pdf
